# Supplementary material for: The Upper Gastrointestinal Cancer Registry (UGICR): a clinical quality registry to monitor and improve care in upper gastrointestinal cancers
Source: PubMed Central journal article supplement — BMJ Open. 2019 Sep 30;9(9):e031434. doi: 10.1136/bmjopen-2019-031434 (PMC6773358; doi:10.1136/bmjopen-2019-031434), 2019-09-30
Supplement: bmjopen-2019-031434.draft_revisions.pdf [file bmjopen-2019-031434.draft_revisions.pdf]

# BMJ Open

BMJ Open is committed to open peer review. As part of this commitment we make the peer review history of every article we publish publicly available.

When an article is published we post the peer reviewers' comments and the authors' responses online. We also post the versions of the paper that were used during peer review. These are the versions that the peer review comments apply to.

The versions of the paper that follow are the versions that were submitted during the peer review process. They are not the versions of record or the final published versions. They should not be cited or distributed as the published version of this manuscript.

BMJ Open is an open access journal and the full, final, typeset and author-corrected version of record of the manuscript is available on our site with no access controls, subscription charges or pay-per-view fees (<http://bmjopen.bmj.com>).

If you have any questions on BMJ Open's open peer review process please email [info.bmjopen@bmj.com](mailto:info.bmjopen@bmj.com)

# BMJ Open

## Cohort Profile: The Upper Gastrointestinal Cancer Registry (UGICR) - a clinical quality registry to monitor and improve care in upper gastrointestinal cancers

|                               |                                                                                                                                                                                                                                                                                                                                                                                                                                                                                                                                                                                                                                                                                                                                                                                                                                                                                                                                                                                                                                                                                                                                                                                                                                                                                                                                                                                                                                                                                                                                                                                                                                                                                                                                      |
|-------------------------------|--------------------------------------------------------------------------------------------------------------------------------------------------------------------------------------------------------------------------------------------------------------------------------------------------------------------------------------------------------------------------------------------------------------------------------------------------------------------------------------------------------------------------------------------------------------------------------------------------------------------------------------------------------------------------------------------------------------------------------------------------------------------------------------------------------------------------------------------------------------------------------------------------------------------------------------------------------------------------------------------------------------------------------------------------------------------------------------------------------------------------------------------------------------------------------------------------------------------------------------------------------------------------------------------------------------------------------------------------------------------------------------------------------------------------------------------------------------------------------------------------------------------------------------------------------------------------------------------------------------------------------------------------------------------------------------------------------------------------------------|
| Journal:                      | <i>BMJ Open</i>                                                                                                                                                                                                                                                                                                                                                                                                                                                                                                                                                                                                                                                                                                                                                                                                                                                                                                                                                                                                                                                                                                                                                                                                                                                                                                                                                                                                                                                                                                                                                                                                                                                                                                                      |
| Manuscript ID                 | bmjopen-2019-031434                                                                                                                                                                                                                                                                                                                                                                                                                                                                                                                                                                                                                                                                                                                                                                                                                                                                                                                                                                                                                                                                                                                                                                                                                                                                                                                                                                                                                                                                                                                                                                                                                                                                                                                  |
| Article Type:                 | Cohort profile                                                                                                                                                                                                                                                                                                                                                                                                                                                                                                                                                                                                                                                                                                                                                                                                                                                                                                                                                                                                                                                                                                                                                                                                                                                                                                                                                                                                                                                                                                                                                                                                                                                                                                                       |
| Date Submitted by the Author: | 04-May-2019                                                                                                                                                                                                                                                                                                                                                                                                                                                                                                                                                                                                                                                                                                                                                                                                                                                                                                                                                                                                                                                                                                                                                                                                                                                                                                                                                                                                                                                                                                                                                                                                                                                                                                                          |
| Complete List of Authors:     | <p>Maharaj, Ashika; Monash University, Epidemiology and Preventative Medicine; Monash University<br/> Holland, Jennifer<br/> Scarborough, Ri<br/> Evans, Sue; Department of Epidemiology and Preventive Me, Monash University<br/> Ioannou, Liane; Monash University, Public Health and Preventive Medicine<br/> Brown, Wendy; Monash University, Department of Surgery, Alfred Hospital<br/> Croagh, Daniel; Monash Health<br/> Pilgrim, Charles ; Alfred Health<br/> Kench, James ; Royal Prince Alfred Hospital<br/> Lipton, Lara; Western Health<br/> Leong, Trevor; Peter MacCallum Cancer Centre<br/> McNeil, John; Monash University, Epidemiology &amp; Preventive Medicine<br/> Nikfarjam, Mehrdad; University of Melbourne, Department of Surgery, Austin Health<br/> Aly, Ahmad; Austin Health<br/> Burton, Paul; Monash University, Department of Surgery, Alfred Health<br/> Cashin, Paul; Monash Health<br/> Chu, Julie; Peter MacCallum Cancer Centre<br/> Duong, Cuong ; Peter MacCallum Cancer Institute,<br/> Evans, Peter ; Peninsula Health<br/> Goldstein, David ; Prince of Wales Hospital Cancer Services,<br/> Haydon, Andrew ; Alfred Health<br/> Hii, Michael; St Vincent's Hospital<br/> Knowles, Brett ; Royal Melbourne Hospital<br/> Merrett, N; Western Sydney University,<br/> Michael, Michael; Peter MacCallum Cancer Centre<br/> Neale, Rachel E.; QIMR Berghofer Medical Research Institute, Herston, Australia, Population Health Division<br/> Philip, Jennifer; St. Vincent's Hospital<br/> Porter, Ian; Cabrini Health<br/> Smith, Marty; Alfred Health<br/> Spillane, John ; Peter MacCallum Cancer Centre<br/> Tagkalidis, Peter; Alfred Health<br/> Zalcborg, John; Monash University</p> |

1  
2  
3  
4  
5  
6  
7  
8  
9  
10  
11  
12  
13  
14  
15  
16  
17  
18  
19  
20  
21  
22  
23  
24  
25  
26  
27  
28  
29  
30  
31  
32  
33  
34  
35  
36  
37  
38  
39  
40  
41  
42  
43  
44  
45  
46  
47  
48  
49  
50  
51  
52  
53  
54  
55  
56  
57  
58  
59  
60

|           |                                                                                                                                                                                          |
|-----------|------------------------------------------------------------------------------------------------------------------------------------------------------------------------------------------|
| Keywords: | Hepatobiliary tumours < ONCOLOGY, Gastrointestinal tumours < GASTROENTEROLOGY, Gastrointestinal tumours < ONCOLOGY, Quality in health care < HEALTH SERVICES ADMINISTRATION & MANAGEMENT |
|           |                                                                                                                                                                                          |

SCHOLARONE™  
Manuscripts

1  
2  
3 **1 Cohort Profile: The Upper Gastrointestinal Cancer Registry (UGICR) – a clinical**  
4  
5 **2 quality registry to monitor and improve care in upper gastrointestinal cancers**  
6  
7  
8  
9

10 **4 Authors**

11 †Ashika D Maharaj<sup>1</sup>, †Jennifer F Holland<sup>1</sup>, Ri O Scarborough<sup>1</sup>, Sue M Evans<sup>1</sup>, Liane  
12 Ioannou<sup>1</sup>, Wendy Brown<sup>2</sup>, Daniel G Croagh<sup>3</sup>, Charles HC Pilgrim<sup>4</sup>, James G Kench<sup>5</sup>, Lara R  
13 Lipton<sup>6</sup>, Trevor Leong<sup>7</sup>, John J McNeil<sup>1</sup>, Mehrdad Nikfarjam<sup>8</sup>, Ahmad Aly<sup>9</sup>, Paul R Burton<sup>2</sup>,  
14 Paul A Cashin<sup>3</sup>, Julie Chu<sup>7</sup>, Cuong P Duong<sup>7</sup>, Peter Evans<sup>10</sup>, David Goldstein<sup>11</sup>, Andrew  
15 Haydon<sup>4</sup>, Michael W Hii<sup>12</sup>, Brett PF Knowles<sup>13</sup>, Neil D Merrett<sup>14</sup>, Michael Michael<sup>7</sup>, Rachel  
16 E Neale<sup>15</sup>, Jennifer Philip<sup>12</sup>, Ian WT Porter<sup>16</sup>, Marty Smith<sup>4</sup>, John Spillane<sup>7</sup>, Peter P  
17 Tagkalidis<sup>4</sup> and \*John R Zalcborg<sup>1</sup>  
18  
19  
20  
21  
22  
23  
24  
25  
26  
27  
28  
29  
30

31 **13 Affiliations**

32  
33 <sup>1</sup> Public Health and Preventive Medicine, Monash University, Victoria, Australia.  
34  
35 <sup>2</sup> Monash University Department of Surgery, Alfred Hospital, Victoria, Australia  
36  
37 <sup>3</sup> Monash Health, Victoria, Australia  
38  
39 <sup>4</sup> Alfred Health, Victoria, Australia  
40  
41 <sup>5</sup> Royal Prince Alfred Hospital, New South Wales, Australia  
42  
43 <sup>6</sup> Western Health, Victoria, Australia  
44  
45 <sup>7</sup> Peter MacCallum Cancer Centre, Victoria, Australia  
46  
47 <sup>8</sup> University of Melbourne Department of Surgery, Austin Health, Victoria, Australia  
48  
49 <sup>9</sup> Austin Health, Victoria, Australia  
50  
51 <sup>10</sup> Peninsula Health, Victoria, Australia  
52  
53 <sup>11</sup> Nelune Comprehensive Cancer Centre, Prince of Wales New South Wales, Australia  
54  
55 <sup>12</sup> St Vincent's Hospital Melbourne, Victoria, Australia  
56  
57 <sup>13</sup> Royal Melbourne Hospital, Victoria, Australia  
58  
59  
60

1  
2  
3 27 <sup>14</sup> School of Medicine, Western Sydney University, New South Wales, Australia  
4

5 28 <sup>15</sup> QIMR Berghofer Medical Research Institute, Queensland, Australia  
6

7 29 <sup>16</sup> Cabrini Health, Victoria, Australia  
8

9 30  
10

11  
12 31 **Corresponding Author**  
13

14 32 Prof John Zalcborg  
15

16 33 Public Health and Preventive Medicine  
17

18 34 Monash University  
19

20 35 533 St Kilda Road  
21

22 36 MELBOURNE VIC 3004  
23

24 37 Phone: +61 3 99030388  
25

26 38 Email: john.zalcborg@monash.edu  
27

28 39  
29

30 31  
31 32  
32 40 † Equal contribution  
33

34 41 \* Corresponding author  
35

36 42  
37

38 43 **Word Count:** 2610 (excluding Abstract and Article Summary)  
39  
40  
41  
42  
43  
44  
45  
46  
47  
48  
49  
50  
51  
52  
53  
54  
55  
56  
57  
58  
59  
60

## 44 **Abstract**

### 45 **Purpose**

46 The Upper Gastrointestinal Cancer Registry (UGICR) was developed to monitor and improve  
47 the quality of care provided to patients with upper gastrointestinal cancers in Australia. Here  
48 we describe the development of a population-based, prospective, upper gastrointestinal  
49 cancer clinical quality registry.

### 50 **Participants**

51 The UGICR supports four cancer modules: pancreatic, oesophagogastric, biliary, and primary  
52 liver cancer. The pancreatic cancer module was the first module to be implemented, with  
53 others being established in a staged approach. Individuals are recruited to the registry if they  
54 are aged 18 years or older, have received care for their cancer at a participating public/private  
55 hospital or private clinic in Australia, and do not opt-out of participation.

### 56 **Findings to date**

57 The registry has human research ethics committee (HREC) approval as a multi-site project  
58 with National Mutual Acceptance (NMA) from Monash Health. The UGICR is governed by  
59 a multi-disciplinary steering committee which provides clinical governance and oversees  
60 clinical working parties. The role of the working parties is to develop quality indicators based  
61 on best practice for each registry module, develop the minimum datasets and provide  
62 guidance in analysing and reporting of results. Data are captured from existing data sources  
63 (population-based cancer incidence registries, pathology databases, and hospital coded data)  
64 and manually from clinical records. Data collectors directly enter information into a secure  
65 web-based REDCap data collection platform. The first module developed was the pancreatic  
66 cancer module which began with a pilot phase and subsequently, we used a formal modified-  
67 Delphi consensus process to establish a core set of quality indicators for pancreatic cancer. A  
68 detailed description of the methods of the modified Delphi process and the selected indicators  
69 has been published separately.

## 70 **Future plans**

71 The UGICR will provide regular reports of risk-adjusted, benchmarked performance on a  
72 range of quality indicators that will highlight variations in care and clinical outcomes at a  
73 health service level. The registry has also been developed with the view to collect Patient-  
74 Reported Outcomes (PROs), which will further add to our understanding of the care of  
75 patients with these cancers.

## 76 **Article Summary**

### 77 **Strengths & Limitations of this Study**

- 78 • The UGICR is the first clinical quality registry in Australia, designed to capture  
79 information on UGI cancers with the aim to improve practice by monitoring and  
80 providing benchmarked reports to participating sites.
- 81 • We describe the development of a clinical quality registry for upper gastrointestinal  
82 (UGI) cancers, including the establishment of governance, recruitment framework,  
83 clinical quality indicators, minimum data set, data access policy and reporting structure.
- 84 • This registry was developed as per the Australian Commission on Quality and Safety in  
85 Health Care's (ACSQHC) Framework for Australian clinical quality registries and  
86 follows ACSQHC's Australian Operating Principles for Clinical Quality Registries and  
87 can be used as a model for researchers developing CQRs.
- 88 • The time consuming and labour-intensive site governance approval process in Australia  
89 is a major limitation for rollout of the registry.

## 90 **Keywords**

91 pancreatic cancer, oesophageal cancer, gastric cancer, liver cancer, biliary cancer, upper  
92 gastrointestinal cancers, clinical registry, quality improvement, quality of care, database,  
93 population health

94

## 95 INTRODUCTION

96 The five most common upper gastrointestinal (UGI) cancers in Australia are pancreas,  
97 oesophagus, stomach, liver (hepatocellular carcinoma) and biliary cancers; the combined  
98 incidence is over 12,000 and there are approximately 8,000 deaths annually.<sup>1,2</sup> The five-year  
99 relative survival rates of UGI cancers are among the worst of all tumour types: 7.7% in  
100 pancreas; 17.3% in liver; 19.2% in biliary; 20.1% in oesophagus; and 28.5% in stomach.<sup>2</sup> The  
101 dismal prognosis of these cancers can be largely attributed to their presentation at an  
102 advanced disease stage. Additionally, older age is a risk factor for mortality from these  
103 tumours, and significant cardiac and respiratory comorbidities may limit treatment options.  
104 As a result, only 15% of pancreas, 43% of liver, 20% of oesophagus, and 50% of stomach  
105 cancers are potentially resectable at diagnosis.<sup>3,4</sup>

106 Resection, with radical lymph node dissection where appropriate, remains the principal  
107 potentially curative therapy for all localised UGI cancers. Disease management is almost  
108 invariably multimodal and may include chemotherapy and radiotherapy as neo-adjuvant,  
109 adjuvant or palliative therapy, and the provision of optimal supportive care.<sup>5-9</sup>

110 The aggressive nature of these cancers and the complexity of treatment often decrease health-  
111 related quality of life.<sup>10</sup> Advances in surgical techniques and perioperative care have resulted  
112 in operative mortality falling to less than 5% in major centres.<sup>11</sup> However surgery remains a  
113 morbid procedure with postoperative complications resulting in prolonged hospital  
114 admission, adversely impacting on overall quality of life and the ability to undergo any  
115 adjuvant therapies.<sup>12</sup> In those surviving one to two years following curative treatment, health-  
116 related quality of life generally recovers to baseline. However, there are still major challenges  
117 faced by survivors. For those having palliative or supportive therapy only, quality of life  
118 frequently deteriorates throughout the disease trajectory.<sup>10</sup>



1  
2  
3 119 Local or distant cancer recurrence occurs frequently following resection for all UGI cancers.  
4  
5 120 A third of patients diagnosed with stomach<sup>13</sup> and half of all patients diagnosed with  
6  
7 121 oesophageal<sup>14</sup> cancer develop recurrent disease within two years. In pancreatic cancer, where  
8  
9 122 only 10%-15% of tumours are considered resectable, the local recurrence rate ranges from  
10  
11 123 10%-40% and distant recurrence is as high as 88%.<sup>15</sup>  
12  
13  
14

#### 15 124 **Variation in Management, Treatment & Outcome**

16  
17 125 There is evidence that variability exists in the management and outcomes of UGI cancers. For  
18  
19 126 example: not all patients are presented to a multi-disciplinary team meeting;<sup>16</sup> there are  
20  
21 127 disparities in the utilisation of surgical resection and associated disease-specific survival  
22  
23 128 based on where patients live;<sup>17</sup> there is wide variation in histopathological assessment of  
24  
25 129 margins and the proportion that have clear margins;<sup>15</sup> the duration of surgery, post-operative  
26  
27 130 complication rates and their management differ between public and private hospitals;<sup>18,19</sup>  
28  
29 131 administration of adjuvant chemotherapy or radiotherapy is variable, often due to morbidity  
30  
31 132 associated with postoperative complications;<sup>20</sup> and the 30-day postoperative mortality is  
32  
33 133 lower in hospitals performing more resections each year.<sup>21,22</sup> Patients with UGI cancers have  
34  
35 134 significant unmet needs pertaining to quality of life, finance, relationships, and family or  
36  
37 135 caregiver distress; these are often exacerbated by a lack of understanding of the health  
38  
39 136 system.<sup>23,24</sup> In pancreatic cancer, over 50% of participants (n=136) in an Australian-based  
40  
41 137 study reported moderate to high unmet physical or psychological needs.<sup>25</sup>  
42  
43  
44  
45  
46  
47

#### 48 138 **Measuring Quality of Care with Clinical Quality Registries**

49  
50 139 To identify, understand and reduce unwarranted clinical variation and ensure that all patients  
51  
52 140 receive optimal care, it is important to collect high-quality disease-specific data. Clinical  
53  
54 141 Quality Registries (CQRs) support continuous improvements in patient outcomes by  
55  
56 142 monitoring quality of care and providing risk-adjusted feedback to the relevant clinical  
57  
58 143 community. These data describe patterns of treatment in order to identify variation, and can  
59  
60

1  
2  
3 144 provide a framework for research.<sup>26</sup> Successful implementation of CQRs has been achieved  
4  
5 145 in a range of disciplines include trauma, cardiac, transplant and bariatric surgery,<sup>27</sup> joint  
6  
7 146 replacement,<sup>28</sup> and cancer care (e.g. prostate).<sup>29</sup>  
8  
9

10 147 The Australian Commission on Safety and Quality in Health Care (ACSQHC) supports the  
11  
12 148 development of CQRs in Australia through the provision of the national framework for  
13  
14 149 CQRs.<sup>30</sup> The framework details the necessary principles, guidelines and standards for best  
15  
16 150 practice design, build, operation and security of CQRs. A recent evaluation of the cost-  
17  
18 151 effectiveness of CQRs determined that when funded sufficiently with robust operating  
19  
20 152 procedures, CQRs provide a substantial return on investment.<sup>31</sup> In prioritising the  
21  
22 153 development of CQRs in Australia, the ACSQHC ranked the development of registries for  
23  
24 154 high-burden cancers only behind those monitoring ischemic heart disease and  
25  
26 155 musculoskeletal disorders.<sup>32</sup> Pancreatic cancer is ranked fourth as a high-burden cancer in  
27  
28 156 terms of its impact on disability-adjusted life years behind lung, bowel and breast cancer.<sup>33</sup> It  
29  
30 157 was predicted to be the third leading cause of cancer deaths in the United States in 2018 and  
31  
32 158 by 2030 is predicted to be the second commonest cause of cancer associated mortality.<sup>3</sup>  
33  
34  
35  
36  
37  
38

39 159 Although a number of generic population-based cancer registries exist, there are no clinical  
40  
41 160 quality registries specific to the five aforementioned UGI cancers. Disease-specific  
42  
43 161 registries<sup>34,35</sup> and audit databases<sup>36</sup> provide much needed evidence about the management of  
44  
45 162 patients with these cancers. However, little prospective data has been published from multi-  
46  
47 163 institution databases and/or registries regarding the quality of UGI cancer care across the  
48  
49 164 disease trajectory.  
50  
51  
52

### 53 165 **Rationale for the UGICR**

54  
55 166 Improvements in cancer outcomes for patients with UGI cancer will understandably come  
56  
57 167 through establishment of models of care that are informed by close attention to clinical and  
58  
59 168 patient-reported quality measures and standardisation of treatment which comply with agreed  
60

1  
2  
3 169 best practice. Given the lack of Australian population-level data regarding patient outcomes  
4  
5 170 from UGI cancers, it was considered that a registry established to monitor treatment and  
6  
7 171 outcomes of patients with cancers arising in the oesophagus, stomach, pancreas, liver and  
8  
9  
10 172 biliary system will improve management of these diseases. Furthermore, while detailed  
11  
12 173 guidelines exist for each of these cancers, gaps remain regarding optimal care and  
13  
14  
15 174 management of these patient groups.<sup>5-9,37</sup>

16  
17  
18 175 The Upper Gastrointestinal Cancer Registry (UGICR) is a clinical quality registry established  
19  
20 176 with the aims to:

- 21  
22  
23 177 (1) assess patterns of care and identify variations in clinical and patient reported outcomes;  
24  
25 178 (2) benchmark performance and provide feedback to service providers using a targeted  
26  
27 179 quality improvement approach, to drive improvements in current practice;  
28  
29  
30 180 (3) provide confidence to public, clinician and wider stakeholders on the delivery of high  
31  
32 181 quality service;  
33  
34 182 (4) advance knowledge of best treatment protocols by facilitating future clinical, health  
35  
36 183 service, psychosocial and biomedical research.

## 38 39 184 **Cohort description**

### 40 41 185 *Overview*

42  
43  
44 186 The UGICR is a multi-centre, population-based, non-interventional prospective cohort study  
45  
46 187 that commenced in 2015.

### 47 48 188 *Ethical approval*

49  
50  
51 189 The registry has human research ethics committee (HREC) approval as a multi-site project  
52  
53 190 with National Mutual Acceptance (NMA) from Monash Health (Ref: 15482A). Ethics  
54  
55 191 approval has also been obtained from Monash University, Cancer Council Victoria, the  
56  
57  
58  
59  
60

1  
2  
3 192 Aboriginal Health and Medical Research Council of New South Wales and a number of  
4  
5 193 private hospitals not recognising the NMA scheme.  
6  
7

#### 8 194 *Governance*

9  
10 195 The UGICR is governed by a Steering Committee and, currently, two clinical working parties  
11  
12 196 with the responsibility of each outlined in *Figure 1*. The Steering Committee performs in  
13  
14 197 accordance with the Australian Framework for Clinical Quality Registries.<sup>30</sup>  
15  
16

17  
18 198 A central research team provides operational oversights. A Principal Investigator (PI) at each  
19  
20 199 participating hospital is responsible for ensuring that research activities undertaken at their  
21  
22 200 site are conducted in accordance with the HREC approval, the research protocol, site registry  
23  
24 201 agreements, and related policy documentation. At each site patients are identified for  
25  
26 202 recruitment and data collection occurs.  
27  
28

29 203 ***Figure 1 here***

#### 30 204 *Registry design*

31  
32 205 The UGICR has a multi-modular design with pancreatic, oesophagogastric (OG), biliary and  
33  
34 206 liver cancer modules. Data are entered into REDCap (Research Electronic Data Capture), a  
35  
36 207 secure web-based application, hosted and managed by Helix (Monash University).<sup>38</sup> The  
37  
38 208 registry was developed in REDCap and all data are held securely on a Monash University  
39  
40 209 server which has been accredited under the information security standard ISO27001.<sup>39</sup>  
41  
42

#### 43 210 *Participant Recruitment and Consent*

44  
45 211 The full recruitment schema is outlined in *Figure 2*. Eligible patients are identified within  
46  
47 212 each jurisdiction through state-based cancer registries or by individual health services.  
48  
49 213 Eligibility criteria are listed in *Table 1*. The UGICR uses an opt-out approach to minimise  
50  
51 214 selection bias.<sup>40</sup>  
52  
53

54 215 ***Figure 2 here***  
55  
56  
57  
58  
59  
60

216 Table 1: Eligibility Criteria

| <b>All Modules</b>      |                  |                                                                                                                                                                                                             |                                                                                                                                                                             |
|-------------------------|------------------|-------------------------------------------------------------------------------------------------------------------------------------------------------------------------------------------------------------|-----------------------------------------------------------------------------------------------------------------------------------------------------------------------------|
| <i>Inclusion</i>        | (i)              | Patient has been assessed or received care for a confirmed primary oesophageal, gastric, liver, biliary, gallbladder or pancreatic cancer with some limited exclusions specified in each module (see below) |                                                                                                                                                                             |
|                         | (ii)             | Patient is 18 years of age or older at time of diagnosis                                                                                                                                                    |                                                                                                                                                                             |
|                         | (iii)            | Patient has a diagnosis date on or after 1st January 2016                                                                                                                                                   |                                                                                                                                                                             |
| <b>Module Specific</b>  |                  |                                                                                                                                                                                                             |                                                                                                                                                                             |
| <b>Modules</b>          |                  | <b>Tumour Sites</b>                                                                                                                                                                                         | <b>Tumour Cell Types</b>                                                                                                                                                    |
| <b>Pancreatic</b>       | <i>Inclusion</i> | Pancreas<br>Periampullary region<br>Ampulla of Vater<br>Biliary origin<br>Intestinal origin<br>Distal bile duct                                                                                             | Ductal adenocarcinoma<br>Cholangiocarcinoma<br>Acinar cell carcinoma<br>Acinar cell cystadenocarcinoma<br>IPMN (invasive)<br>Pancreatoblastoma<br>Serous cystadenocarcinoma |
|                         | <i>Exclusion</i> | Non-distal bile duct                                                                                                                                                                                        | Neuroendocrine neoplasms<br>Premalignant lesions<br>Mesenchymal tumours<br>Solid pseudopapillary carcinoma<br>IPMN (non-invasive)                                           |
| <b>Oesophagogastric</b> | <i>Inclusion</i> | Oesophagus (lower two thirds)<br>Gastro-oesophageal junction<br>Stomach                                                                                                                                     | Carcinoma<br>Adenocarcinoma<br>Squamous cell carcinoma<br>Other subtypes                                                                                                    |
|                         | <i>Exclusion</i> | Upper third of oesophagus                                                                                                                                                                                   | Neuroendocrine neoplasms<br>Lymphomas<br>Mesenchymal tumours                                                                                                                |
| <b>Biliary</b>          | <i>Inclusion</i> | Perihilar (hilar) bile duct<br>Intrahepatic bile duct<br>Gallbladder                                                                                                                                        | Carcinoma<br>Cholangiocarcinoma<br>Adenosquamous carcinoma<br>Squamous cell carcinoma<br>Cholangiosarcoma                                                                   |
|                         | <i>Exclusion</i> | Distal bile duct                                                                                                                                                                                            | Neuroendocrine neoplasms<br>Mesenchymal tumours                                                                                                                             |
| <b>Liver*</b>           | <i>Inclusion</i> | Liver                                                                                                                                                                                                       | Hepatocellular carcinoma                                                                                                                                                    |
|                         | <i>Exclusion</i> | Intrahepatic bile duct                                                                                                                                                                                      | Cholangiocarcinoma<br>Mesenchymal tumours<br>Germ cell tumours<br>Lymphomas                                                                                                 |

217 Abbreviations: IPMN, Intraductal Papillary Mucinous Neoplasm

218 \*Liver module eligibility criteria still to be finalised

1  
2  
3 219 Eligible participants are mailed an introductory letter explaining the study and an information  
4  
5 220 booklet outlining details of the registry, its purpose, possible outcomes of the research and the  
6  
7  
8 221 opt-out process. Participants are given two weeks to opt out of the registry before their  
9  
10 222 consent is assumed, after which we commence collection of clinical and personal data  
11  
12 223 covering diagnosis to end-of-life care. Patients can withdraw their consent from participation  
13  
14 224 in the registry at any point by telephoning or emailing the UGICR office, as outlined in the  
15  
16 225 participant information booklet. A waiver of consent applies where patients deemed eligible  
17  
18 226 require an interpreter, have significant cognitive impairment, or where there is evidence that  
19  
20 227 the patient is deceased.

## 24 228 **Findings to date**

### 26 229 *Data Set*

28 230 The first module developed was the pancreatic cancer module, which began with a pilot  
29  
30 231 phase during which we collected data for a provisional set of quality indicators in three  
31  
32 232 Victorian sites from 2016-2017. Subsequently, we used a formal modified-Delphi consensus  
33  
34 233 process to establish a core set of quality indicators for pancreatic cancer. This process  
35  
36 234 involved 19 pancreatic cancer care experts from three states in Australia. A detailed  
37  
38 235 description of the methods of the modified Delphi process and the selected indicators has  
39  
40 236 been published separately.<sup>41</sup> In addition, a review was undertaken of the Australian Optimal  
41  
42 237 Care Pathways (OCP) for pancreatic cancer<sup>42</sup> and oesophagogastric cancer<sup>43</sup> to ensure that  
43  
44 238 indicators are aligned with the seven themes described in the OCP (prevention and early  
45  
46 239 detection; presentation, initial investigations and referral; diagnosis, staging and treatment  
47  
48 240 planning; treatment; care after initial treatment and recovery; managing recurrent, residual, or  
49  
50 241 metastatic disease; end-of-life care). An outline of this process for pancreatic cancer is  
51  
52 242 provided in *Table 2*.

53  
54  
55  
56  
57  
58  
59 243  
60

244 Table 2: Pancreatic cancer optimal care pathway mapped to modified-Delphi quality indicators

| PANCREATIC CANCER OPTIMAL CARE PATHWAY (OCP)                         | OCP ELEMENTS                                                                            | MAPPED QUALITY INDICATORS FROM MODIFIED-DELPHI CONSENSUS <sup>41</sup>                                                                                                                                                                                                                                                                                                                         |
|----------------------------------------------------------------------|-----------------------------------------------------------------------------------------|------------------------------------------------------------------------------------------------------------------------------------------------------------------------------------------------------------------------------------------------------------------------------------------------------------------------------------------------------------------------------------------------|
| <b>STEP ONE: Prevention and early detection</b>                      | 1.1 Prevention<br>1.2 Risk factors<br>1.3 Early detection                               | NIL                                                                                                                                                                                                                                                                                                                                                                                            |
| <b>STEP TWO: Presentation, initial investigations and referral</b>   | 2.1 Signs and symptoms<br>2.2 Assessments by GP or medical practitioner<br>2.3 Referral | <ul style="list-style-type: none"> <li>• Documented baseline CA19-9 level before treatment</li> <li>• Documented ECOG and/or ASA at presentation</li> <li>• Time from referral to definitive treatment within 60 days</li> </ul>                                                                                                                                                               |
|                                                                      | 2.4, 3.5, 4.6, 5.4, 6.6, 7.3<br>Support and communication                               | NIL                                                                                                                                                                                                                                                                                                                                                                                            |
| <b>STEP THREE: Diagnosis, assessment and treatment planning</b>      | 3.1 Diagnostic workup<br>3.2 Staging<br>3.3 Treatment planning                          | <ul style="list-style-type: none"> <li>• Documented pancreatic protocol CT or MRI scan for diagnosis and/or staging</li> <li>• Operability of tumour is clearly defined and documented as either operable/resectable, borderline resectable, locally advanced (unresectable) or metastatic (unresectable)</li> <li>• Disease management for all patients discussed at a MDT meeting</li> </ul> |
|                                                                      | 3.4, 4.4, 5.3, 6.5, 7.2<br>Research and clinical Trials                                 | <ul style="list-style-type: none"> <li>• Number of patients included in a clinical trial</li> </ul>                                                                                                                                                                                                                                                                                            |
|                                                                      | 3.1, 3.2<br>Timeframe                                                                   | <ul style="list-style-type: none"> <li>• Time from referral to definitive treatment within 60 days</li> </ul>                                                                                                                                                                                                                                                                                  |
| <b>STEP FOUR: Treatment</b>                                          | 4.1 Treatment intent                                                                    | NIL                                                                                                                                                                                                                                                                                                                                                                                            |
|                                                                      | 4.2.1 Surgery (Curative)                                                                | <ul style="list-style-type: none"> <li>• All patients who did not undergo surgery should have a valid reason documented</li> <li>• Number of patients undergoing pancreatic cancer surgery in a level 1-4 hospital</li> </ul>                                                                                                                                                                  |
|                                                                      | 4.2.1 Chemotherapy or chemo-radiation                                                   | <ul style="list-style-type: none"> <li>• Adjuvant chemotherapy administered following surgery or a reason documented for not undergoing treatment</li> </ul>                                                                                                                                                                                                                                   |
|                                                                      | 4.2.2, 4.3<br>Treatment of unresectable pancreatic cancer / palliative care             | <ul style="list-style-type: none"> <li>• Chemotherapy ± chemo-radiation offered to patients with locally advanced disease, or a reason documented for not undergoing treatment</li> <li>• Number of patients who saw a medical or radiation oncologist or a reason documented for not doing so</li> </ul>                                                                                      |
|                                                                      | 4.5 Complementary or alternative therapies                                              | NIL                                                                                                                                                                                                                                                                                                                                                                                            |
| <b>STEP FIVE: Care after initial treatment and recovery</b>          | 5.1 Survivorship<br>5.2 Post-treatment care planning                                    | <ul style="list-style-type: none"> <li>• All patients having completed treatment followed up by a specialist every three to six months for up to 2 years</li> </ul>                                                                                                                                                                                                                            |
| <b>STEP SIX: Managing recurrent, residual and metastatic disease</b> | 6.1 Signs and symptoms of recurrent, residual or metastatic disease                     |                                                                                                                                                                                                                                                                                                                                                                                                |
| <b>STEP SEVEN: End-of-life care</b>                                  | 6.4 Palliative care                                                                     | <ul style="list-style-type: none"> <li>• All patients with metastatic disease referred to (or seen by) palliative care specialist</li> </ul>                                                                                                                                                                                                                                                   |
|                                                                      | 7.1 Multidisciplinary palliative care                                                   |                                                                                                                                                                                                                                                                                                                                                                                                |

Footnote: Some elements in each step of the pathway are overlapping. Elements 6.2 & 6.3 readdress steps 3 and 4. Please note: The purpose of this document is to provide a broad overview of the areas within the OCP that the developed pancreatic cancer quality indicators measure. Only the key indicators that map to the elements are listed.

For peer review only



1  
2  
3 246 The minimum data set was established to enable quality indicators to be calculated. Data  
4  
5 247 items and definitions were aligned with national specifications where appropriate and a  
6  
7 248 comprehensive data dictionary was developed for each module. The core data items are  
8  
9  
10 249 outlined in *Table 3*.  
11  
12  
13  
14  
15  
16  
17  
18  
19  
20  
21  
22  
23  
24  
25  
26  
27  
28  
29  
30  
31  
32  
33  
34  
35  
36  
37  
38  
39  
40  
41  
42  
43  
44  
45  
46  
47  
48  
49  
50  
51  
52  
53  
54  
55  
56  
57  
58  
59  
60

For peer review only

250 Table 3: UGICR minimum dataset#

251

| <b>Participant details</b>           | <b>Diagnosis and staging</b> (prior to anti-tumour treatment)                       | <b>Chemotherapy</b>                                    |
|--------------------------------------|-------------------------------------------------------------------------------------|--------------------------------------------------------|
| Title                                | Diagnosis date                                                                      | Treatment intent                                       |
| First name                           | Date mass first seen on imaging                                                     | (Neoadjuvant/Adjuvant/Definitive/Palliative)*          |
| Middle name(s)                       | Diagnostic imaging tests completed^                                                 | Date chemotherapy commenced                            |
| Surname                              | Pathology testing prior to anti-tumour treatment                                    | Chemotherapy agent(s) administered                     |
| Recruiting hospital                  | Cytology date                                                                       | Name of medical oncologist                             |
| Medical Record Number                | Histology date                                                                      | Hospital providing chemotherapy                        |
| Date of birth                        | Primary site of tumour                                                              | <b>Radiotherapy</b>                                    |
| Sex                                  | Tumour morphology                                                                   | Treatment intent                                       |
| Medicare number                      | Clinical disease stage (TNM)                                                        | (Neoadjuvant/Adjuvant/Definitive/Palliative)*          |
| Department of Veteran Affairs number | Resectability of tumour at diagnosis                                                | Date radiotherapy commenced                            |
| Country of birth                     | CA 19-9 measured                                                                    | Radiation oncologist                                   |
| Preferred language                   | Discussion at a multidisciplinary team meeting                                      | Radiotherapy technique                                 |
| Interpreter required                 | Date earliest multidisciplinary team meeting                                        | Body sites treated                                     |
| Indigenous status                    | discussion                                                                          | Total dose given (Gy)                                  |
| Contact details                      | Diagnosing hospital                                                                 | Number of fractions                                    |
| Phone number(s)                      | <b>Surgery</b>                                                                      | Name of radiation oncologist                           |
| Email address                        | Date of operation                                                                   | Hospital providing radiotherapy                        |
| Postal Address                       | Type of resection                                                                   | <b>Restaging after neoadjuvant therapy</b>             |
| Residential Address at diagnosis     | Surgical approach                                                                   | Date neoadjuvant therapy completed                     |
| Next of kin and contact details      | Reason resection surgery abandoned                                                  | Resectability of tumour                                |
| General Practitioner details         | Date of return to theatre                                                           | Clinical disease (TNM)                                 |
| Deceased status                      | Re-admitted to hospital within 90 days of surgery (excluding same day chemotherapy) | <b>Other treatment and end-of-life care</b>            |
| Date of death                        | Date of readmission                                                                 | Referral to or contact with palliative care            |
| Cause of death                       | Died in surgical admission                                                          | Date of referral to palliative care                    |
|                                      | Name of consultant surgeon                                                          | ≥2 ED presentations in the last 30 days prior to death |
|                                      | Hospital where surgery was performed                                                | ≥14 days in acute hospital during last 30 days of life |
|                                      | Resection pathology                                                                 | Died within 30 days of dose of chemotherapy            |
|                                      | Maximum dimension of tumour                                                         |                                                        |
|                                      | Number of lymph nodes examined                                                      |                                                        |
|                                      | Number of lymph nodes positive                                                      |                                                        |
|                                      | Closest reported margin                                                             |                                                        |
|                                      | Pathologic staging (pTNM)                                                           |                                                        |
|                                      | Histology                                                                           |                                                        |

252 # More detailed, module specific data dictionaries have been developed. ^Varies between modules \*All related data items collected for first cycle of each type of treatment

253 intent

1  
2  
3 254 The OG module has been developed by the OG working party following a literature review,  
4  
5 255 and a consensus method was used to agree upon the quality indicator set. The registry has  
6  
7 256 future plans to begin the collection of Patient Reported Outcomes (PROs) and Patient  
8  
9 257 Reported Experiences (PREs) to provide valuable patient perspectives. As an initial step, a  
10  
11 258 systematic review evaluating Patient Reported Outcome Measures (PROMs) in pancreatic  
12  
13 259 cancer has been undertaken by the UGICR team to define which PROMs are most  
14  
15 260 appropriate for this group of patients.  
16  
17  
18

### 19 261 *Data collection*

20  
21 262 If the participant has not opted out of the registry, data collectors abstract diagnosis, surgical,  
22  
23 263 pathology and treatment data directly from the participant's electronic and/or hard copy  
24  
25 264 medical records from participating sites or from clinician rooms. Data collection begins  
26  
27 265 within four months of recruitment with at least annual follow-up until end-of-life.  
28  
29  
30

### 31 266 *Reporting*

32  
33 267 The registry will produce risk-adjusted benchmarked reports that will feed back de-identified  
34  
35 268 data to participating sites on the associated quality indicators. To provide fair and meaningful  
36  
37 269 benchmarked reports, we have undertaken a review of risk models to identify demographic  
38  
39 270 and baseline clinical variables (focusing on those over which clinicians have no control e.g.  
40  
41 271 age, sex, disease stage) that predict patient outcomes for the purposes of risk-adjustment. The  
42  
43 272 data from the registry will also permit validation of current predictive risk models and enable  
44  
45 273 further refinement of these tools. Publicly available annual reports that provide an overview  
46  
47 274 of quality of care and the registry's activities will be published. A UGICR website  
48  
49 275 ([www.ugicr.org.au](http://www.ugicr.org.au)) has been developed to provide information about the registry to patients,  
50  
51 276 clinicians and other stakeholders. This will be updated to include results as they become  
52  
53 277 available.  
54  
55  
56  
57  
58  
59  
60

## 278 **Strengths and Limitations**

279 The UGICR is Australia's first UGI cancer CQR. The aims of the registry are to monitor  
280 quality of care, benchmark clinical and patient-reported outcomes against best practice, and  
281 provide high-quality population-based data for clinical research. Registries such as the  
282 UGICR provide much needed real-world evidence outside the context of randomised control  
283 trials about disease epidemiology, treatment patterns, burden of illness, survival outcomes,  
284 clinical variation, and treatment safety.<sup>44</sup>

285 In recent decades, there has been increasing integration of PROMs into cancer registries to  
286 collect outcomes such as overall quality of life, functional and psychosocial well-being,  
287 lifestyle behaviours, and supportive care needs.<sup>45</sup> Clinicians and patients may place different  
288 emphasis on symptom impacts and expectations from their treatment.<sup>46</sup> The collection of  
289 PROMs is an important step in understanding patients' experience of their symptoms and  
290 management, and the impact of the disease and its treatment on their quality of life. The  
291 UGICR will determine and integrate the most relevant PROMs for each UGI cancer type  
292 following thorough examination of the literature.

293 Through the accumulation of significant and consistent data on UGI cancers, the registry will  
294 assess how clinical management compares with best practice and communicate this to  
295 clinicians through the PIs or relevant hospital departments. Further, the UGICR provides a  
296 platform for longer-term clinical follow-up, randomised clinical trials and sub-studies  
297 exploring treatment outcomes and linking outcomes to tumour tissue characteristics.

298 An important consideration is the maturity of each module before useful quality indicator  
299 reports can be provided to participating hospitals, as some UGI cancers have a relatively low  
300 incidence in comparison to other cancers.<sup>2</sup> The working groups in collaboration with

1  
2  
3 301 statisticians will determine an analysis plan for each indicator with due consideration to data  
4  
5 302 completeness and risk adjustment methods.

### 8 303 *Identified challenges*

10 304 The UGICR has faced some key challenges affecting its establishment and implementation.

12 305 The introduction of the NMA scheme has significantly streamlined the ethics process for all  
13  
14 306 public hospitals in Australia, except in the Northern Territory, making the process to gain  
15  
16 307 approval for CQRs more manageable. However, obtaining governance approval at each site  
17  
18 308 continues to be both labour intensive and time consuming.<sup>47,48</sup> Further, separate HREC  
19  
20 309 approval is frequently required to access data from private hospitals and clinics.

24 310 Funding is another challenge faced by CQRs. As with many healthcare initiatives, the  
25  
26 311 financial burden can be a major impediment.<sup>26</sup> Data from CQRs are held in positive regard by  
27  
28 312 clinicians, health managers and government. However, further funding will be required to  
29  
30 313 progress national rollout of the registry.

34 314 Other identified barriers include reluctance of some healthcare providers to supply source  
35  
36 315 data, and poor interoperability between clinical information systems leading to duplication of  
37  
38 316 data entry. Where data are of high quality, such as for diagnosis and procedure codes,  
39  
40 317 administrative data is appropriate, but there are limited data for comorbidities and risk  
41  
42 318 factors.<sup>49</sup> While automation of data collection from existing data sources would be ideal, this  
43  
44 319 is hampered by inconsistent documentation and a lack of standardisation.<sup>50</sup>

### 48 320 *Collaboration*

50 321 The UGICR aims to capture whole of population, real-world data that monitors and aspires to  
51  
52 322 improve the quality of care provided to patients with UGI cancers. The registry is currently  
53  
54 323 recruiting hospitals to increase population capture and selecting the most relevant instruments  
55  
56 324 for measuring PROs and PREs for inclusion in each module. The biliary module is entering  
57  
58 325 its pilot phase and the liver module is to be developed. Monash University is the UGICR's

1  
2  
3 326 data custodian and is accountable for the privacy, security and integrity of patient information  
4  
5  
6 327 held within the registry. Participating sites can request a copy of their own patient-level data.  
7  
8 328 Researchers may access registry data following a formal submission to the UGICR data  
9  
10 329 custodian and approval by the UGICR Steering Committee. They are required to complete a  
11  
12 330 request form detailing their research aims and methods, potential impact on healthcare, and  
13  
14 331 provide evidence relevant HREC approval before de-identified data will be released. The  
15  
16 332 registry will harness new opportunities for data linkage with technologies such as the  
17  
18 333 electronic medical records and collaborate with existing data repositories (e.g. biomedical) to  
19  
20 334 evolve and fulfil its aim of providing quality evidence.  
21  
22

## 23 335 **Declarations**

### 24 336 **Ethics approval**

25  
26 337 This project has received human research ethics committee (HREC) approval from the  
27  
28 338 following HRECs: Monash Health (Ref: 15482A) under the National Mutual Acceptance  
29  
30 339 (NMA) scheme (HREC/15/MonH/134); Cancer Council Victoria (HREC 1611); Epworth  
31  
32 340 HealthCare (EH2017-227), Aboriginal Health & Medical Research Council (1387/18) and is  
33  
34 341 registered with Monash University (CF16/119-2016000051).  
35  
36  
37  
38  
39

### 40 342 **Patient and Public Involvement**

41  
42 343 The UGICR uses an opt-out approach to minimise selection bias and participants are given  
43  
44 344 two weeks to opt out of the registry before their consent is assumed. Patients can withdraw  
45  
46 345 their consent from participation in the registry at any point. A waiver of consent applies  
47  
48 346 where patients deemed eligible require an interpreter, have significant cognitive impairment,  
49  
50 347 or where there is evidence that the patient is deceased. This approach has been approved by  
51  
52 348 the aforementioned ethics committees.  
53  
54  
55

### 56 349 **Consent for publication**

57  
58 350 Not Applicable  
59  
60

1  
2  
3 351 [Availability of data and material](#)  
4

5 352 Not Applicable  
6

7 353 [Competing interests](#)  
8

9 354 None declared  
10

11 355 [Data sharing statement](#)  
12

13  
14 356 This study describes attributes of the registry and contains no patient-level data  
15

16 357 [Funding](#)  
17

18 358 The authors gratefully acknowledge the Victorian Government, Pancare Foundation,  
19

20 359 Specialised Therapeutics Australia, Servier Australia, Eli Lilly Australia, and the Australian  
21

22 360 National Health and Medical Research Council (NHMRC) for the Pancreatic Cancer Registry  
23

24 361 for Quality Improvement (PCR4QI) grant [grant number APP1125395]. The Victorian  
25

26 362 Government and Pancare Foundation were involved in the design of the study through  
27

28 363 steering committee representation.  
29

30 364 [Authors' Contributions](#)  
31

32 365 AM and JH are joint first authors on this manuscript. SE, WB, DC, CP, JK, LL, TL, JM, MN  
33

34 366 and JZ are part of the UGICR Steering Committee. SE, WB, DC, CP, JK, LL, TL, MN, AA,  
35

36 367 PB, PC, JC, CD, PE, DG, AH, MH, BK, NM, MM, RN, JP, IP, MS, JS, PT and JZ are part of  
37

38 368 the working parties. RS and JH developed the registry protocol in consultation with the  
39

40 369 UGICR Steering Committee and working parties. All authors reviewed and provided  
41

42 370 feedback on the drafts of the manuscript and approved the final version.  
43

44 371 [Acknowledgements](#)  
45

46 372 The authors gratefully acknowledge our consumer representatives, Jan Gibson and David  
47

48 373 Attwood, for their ongoing support and contribution to the registry. The authors would also  
49

50 374 like to acknowledge the participating hospitals and Victorian Cancer Registry for providing  
51

52 375 ongoing data to the UGICR.  
53  
54  
55  
56  
57  
58  
59  
60

376 **References**

- 377 1. Melaku YA, Appleton SL, Gill TK, et al. Incidence, prevalence, mortality, disability-adjusted  
378 life years and risk factors of cancer in Australia and comparison with OECD countries, 1990–  
379 2015: findings from the Global Burden of Disease Study 2015. *Cancer Epidemiol* 2018  
380 Feb;52:43-54.
- 381 2. Australian Institute of Health and Welfare. Cancer in Australia 2017. Canberra: AIHW; 2017.  
382 205p. Cancer series no.101
- 383 3. Siegel RL, Miller KD, Jemal A. Cancer statistics, 2017. *CA Cancer J Clin*. 2017 Jan;67(1):7-30.
- 384 4. Rugge M, Fassan M, Graham DY, Strong VE (ed). Epidemiology of Gastric Cancer [internet].  
385 Switzerland: Springer; 2015 [cited 2018 Nov 18]. p23-34. Available from URL DOI  
386 (10.1007/978-3-319-15826-6\_2)
- 387 5. Ducreux M, Cuhna AS, Caramella C, et al. Cancer of the pancreas: ESMO Clinical Practice  
388 Guidelines for diagnosis, treatment and follow-up. *Ann Oncol* 2015 Sep;26(suppl\_5):v56-v68.
- 389 6. Vogel A, Cervantes A, Chau I, et al. Hepatocellular carcinoma: ESMO Clinical Practice  
390 Guidelines for diagnosis, treatment and follow-up. *Ann Oncol* 2018 Oct;29(Supplement\_4):  
391 iv238-iv55.
- 392 7. Lordick F, Mariette C, Haustermans K, et al. Oesophageal cancer: ESMO Clinical Practice  
393 Guidelines for diagnosis, treatment and follow-up. *Ann Oncol* 2016 Sep;27(suppl\_5):v50-v7.
- 394 8. Smyth EC, Verheij M, Allum W, et al. Gastric cancer: ESMO Clinical Practice Guidelines for  
395 diagnosis, treatment and follow-up. *Ann Oncol* 2016 Sep;27(suppl\_5):v38-v49.
- 396 9. Valle JW, Borbath I, Khan SA, et al. Biliary cancer: ESMO Clinical Practice Guidelines for  
397 diagnosis, treatment and follow-up. *Ann Oncol* 2016 Sep;27(suppl\_5):v28-v37.
- 398 10. Whistance RN, Blazeby JM. Systematic review: Quality of life after treatment for upper  
399 gastrointestinal cancer. *Curr Opin Support Palliat Care* 2011;5(1):37-46.
- 400 11. Davis SS, Babidge WJ, Kiermeier A, et al. Perioperative Mortality Following Oesophagectomy  
401 and Pancreaticoduodenectomy in Australia. *World J Surg* 2018 Mar;42(3):742-8.
- 402 12. Zhou J, Hiki N, Mine S, et al. Role of prealbumin as a powerful and simple index for  
403 predicting postoperative complications after gastric cancer surgery. *Ann Surg Oncol* 2017  
404 Feb;24(2):510-7.
- 405 13. Spolverato G, Ejaz A, Kim Y, et al. Rates and Patterns of Recurrence after Curative Intent  
406 Resection for Gastric Cancer: A United States Multi-Institutional Analysis. *J Am Coll Surg*  
407 2014 Oct;219(4):664-75.
- 408 14. Knight WC, Zylstra J, Van Hemelrijck M, et al. Patterns of recurrence in oesophageal cancer  
409 following oesophagectomy in the era of neoadjuvant chemotherapy. *BJS Open* 2017  
410 Dec;1(6):182-90.
- 411 15. Chandrasegaram MD, Goldstein D, Simes J, et al. Meta-analysis of radical resection rates and  
412 margin assessment in pancreatic cancer. *BJS Open* 2015 Nov;102(12):1459-72.
- 413 16. Brauer DG, Strand MS, Sanford DE, et al. Utility of a multidisciplinary tumor board in the  
414 management of pancreatic and upper gastrointestinal diseases: an observational study. *HPB*  
415 (Oxford) 2017 Feb;19(2):133-9.
- 416 17. Shapiro M, Chen Q, Huang Q, et al. Associations of socioeconomic variables with resection,  
417 stage, and survival in patients with early-stage pancreatic cancer. *JAMA Surg* 2016  
418 Apr;151(4):338-45.
- 419 18. Chua TC, Mittal A, Nahm C, et al. Pancreatoduodenectomy in a public versus private  
420 teaching hospital is comparable with some minor variations. *ANZ J Surg* 2018;88(6):E526-  
421 E31.
- 422 19. Busweiler LA, Henneman D, Dikken JL, et al. Failure-to-rescue in patients undergoing surgery  
423 for esophageal or gastric cancer. *Eur J Surg Oncol* 2017 Oct;43(10):1962-9.
- 424 20. Schouwenburg MG, Busweiler LAD, Beck N, et al. Hospital variation and the impact of  
425 postoperative complications on the use of perioperative chemo(radio)therapy in resectable



1  
2  
3  
4  
5  
6  
7  
8  
9  
10  
11  
12  
13  
14  
15  
16  
17  
18  
19  
20  
21  
22  
23  
24  
25  
26  
27  
28  
29  
30  
31  
32  
33  
34  
35  
36  
37  
38  
39  
40  
41  
42  
43  
44  
45  
46  
47  
48  
49  
50  
51  
52  
53  
54  
55  
56  
57  
58  
59  
60

- gastric cancer. Results from the Dutch Upper GI Cancer Audit. *Eur J Surg Oncol* 2018 Apr;44(4):532-8.
21. Dikken JL, Van Sandick JW, Allum WH, et al. Differences in outcomes of oesophageal and gastric cancer surgery across Europe. *BJS Open* 2013 Jan;100(1):83-94.
22. Skipworth RJE, Parks RW, Stephens NA, et al. The relationship between hospital volume and post-operative mortality rates for upper gastrointestinal cancer resections: Scotland 1982–2003. *Eur J Surg Oncol* 2010 Feb;36(2):141-7.
23. Otutaha B, Srinivasa S, Koea J. Patient information needs in upper gastrointestinal cancer: what patients and their families want to know. *ANZ J Surg* 2018 Jan;89(1-2):20-4
24. Shaw J, Harrison J, Young J, et al. Coping with newly diagnosed upper gastrointestinal cancer: a longitudinal qualitative study of family caregivers' role perception and supportive care needs. *Support Care Cancer* 2013 Mar;21(3):749-56.
25. Beesley VL, Janda M, Goldstein D, et al. A tsunami of unmet needs: pancreatic and ampullary cancer patients' supportive care needs and use of community and allied health services. *Psycho-Oncology* 2016 Feb;25(2):150-7.
26. Wilcox N, McNeil JJ. Clinical quality registries have the potential to drive improvements in the appropriateness of care. *Med J Aust* 2016 Nov;205(10):S27-S9.
27. Stey AM, Russell MM, Ko CY, et al. Clinical registries and quality measurement in surgery: a systematic review. *Surgery* 2015 Feb;157(2):381-95.
28. Owen D, Russell N, Smith P, et al. An estimation of the incidence of squeaking and revision surgery for squeaking in ceramic-on-ceramic total hip replacement: a meta-analysis and report from the Australian Orthopaedic Association National Joint Registry. *Bone Joint J* 2014 Feb;96(2):181-7.
29. Evans SM, Millar JL, Wood JM, et al. The Prostate Cancer Registry: monitoring patterns and quality of care for men diagnosed with prostate cancer. *BJU Int* 2013;111(4b):E158-E66.
30. Australian Commission on Safety and Quality in Healthcare (ACSQHC). Framework for Australian Clinical Quality Registries. Australia 2014 [cited 2018 29/10/2018]; Available from: <https://www.safetyandquality.gov.au/our-work/information-strategy/clinical-quality-registries/>
31. Ahern S, Evans S, Hopper I, Zalcborg J. Towards a strategy for clinical quality registries in Australia. *Aust Heal Rev* 2018 Feb.
32. Australian Commission on Safety and Quality in Healthcare. Prioritised list of clinical domains for clinical quality registry development: Final report. Sydney: ACSQHC; 2016.
33. Australian Institute of Health and Welfare. Burden of Cancer in Australia: Australian Burden of Disease Study 2011. Canberra: AIHW. 2017. 145p. Study series no. 12
34. Egawa S, Toma H, Ohigashi H, et al. Japan Pancreatic Cancer Registry; 30th year anniversary: Japan Pancreas Society. *Pancreas* 2012 Oct;41(7):985-92.
35. De Steur W, Henneman D, Allum W, et al. Common data items in seven European oesophagogastric cancer surgery registries: towards a European upper GI cancer audit (EURECCA Upper GI). *Eur J Surg Oncol* 2014 Mar;40(3):325-9.
36. Busweiler L, Jeremiasen M, Wijnhoven B, et al. International benchmarking in oesophageal and gastric cancer surgery. *BJS Open* 2018 Oct.
37. Te Riele W, van Tinteren H, van Sandick J. Centralization of upper gastrointestinal cancer care should be dictated by quality of care. *Ann Surg Oncol* 2018 Dec;25:984-5
38. Harris PA, Taylor R, Thielke R, et al. Research electronic data capture (REDCap)--a metadata-driven methodology and workflow process for providing translational research informatics support. *J Biomed Inform* 2009 Apr;42(2):377-81.
39. International Standards Organisation. ISO/IEC 27001 Information technology - Security techniques - Information security management systems - Requirements: ISO; 2005.
40. Tu JV, Willison DJ, Silver FL, et al. Impracticability of Informed Consent in the Registry of the Canadian Stroke Network. *N Engl J Med* 2004 Apr;350(14):1414-21.

- 1  
2  
3 477 41. Maharaj AD, Ioannou L, Croagh D, et al. Monitoring quality of care for patients with  
4 478 pancreatic cancer: a modified Delphi consensus. *HPB (Oxford)* 2018 Oct.  
5 479 42. Cancer Council Australia. Optimal Care Pathway for People with Pancreatic Cancer. 2016  
6 480 [cited 2018 Oct 20]; Available from:  
7 481 [https://www.cancer.org.au/content/ocp/health/optimal-care-pathway-for-people-with-](https://www.cancer.org.au/content/ocp/health/optimal-care-pathway-for-people-with-pancreatic-cancer-june-2016.pdf)  
8 482 [pancreatic-cancer-june-2016.pdf](https://www.cancer.org.au/content/ocp/health/optimal-care-pathway-for-people-with-pancreatic-cancer-june-2016.pdf)  
9 483 43. Cancer Council Australia. Optimal Care Pathway for People with Oesophagogastric Cancer.  
10 484 2016 [2018 Nov 18]; Available from:  
11 485 [https://www.cancer.org.au/content/ocp/health/optimal-care-pathway-for-people-with-](https://www.cancer.org.au/content/ocp/health/optimal-care-pathway-for-people-with-oesophagogastric-cancer-june-2016.pdf)  
12 486 [oesophagogastric-cancer-june-2016.pdf](https://www.cancer.org.au/content/ocp/health/optimal-care-pathway-for-people-with-oesophagogastric-cancer-june-2016.pdf)  
13 487 44. Berger ML, Sox H, Willke RJ, et al. Good practices for real-world data studies of treatment  
14 488 and/or comparative effectiveness: Recommendations from the joint ISPOR-ISPE Special Task  
15 489 Force on real-world evidence in health care decision making. *Pharmacoepidemiol Drug Saf*  
16 490 2017 Sep;26(9):1033-9.  
17 491 45. Ashley L, Jones H, Thomas J, et al. Integrating patient reported outcomes with clinical cancer  
18 492 registry data: a feasibility study of the electronic Patient-Reported Outcomes From Cancer  
19 493 Survivors (ePOCS) system. *J Med Internet Res* 2013 Oct;15(10):e230-e.  
20 494 46. Chassany O, Shaheen NJ, Karlsson M, et al. Systematic review: symptom assessment using  
21 495 patient-reported outcomes in gastroesophageal reflux disease and dyspepsia. *Scand J*  
22 496 *Gastroenterol* 2012;47(12):1412-21.  
23 497 47. Clay-Williams R, Taylor N, Braithwaite J. Potential solutions to improve the governance of  
24 498 multi centre health service research. *Med J Aust* 2018 Mar;208(4):152-4.  
25 499 48. Brown WA, Smith BR, Boglis M, et al. Streamlining ethics review for multisite quality and  
26 500 safety initiatives: national bariatric surgery registry experience. *Med J Aust* 2016  
27 501 Sep;205(200-1).  
28 502 49. Alexander M, Evans SM, Wolfe R, et al. Risks of using medical record and administrative data  
29 503 for prognostic models. *Med J Aust* 2017 Aug;207(3):126.  
30 504 50. Gliklich RE DN, Leavy MB, . Registries for Evaluating Patient Outcomes: A User's  
31 505 Guide[internet]. 3<sup>rd</sup> Ed. Rockville (MD): Agency for Healthcare Research and Quality (US);  
32 506 2014 Apr. Available from: <https://www.ncbi.nlm.nih.gov/books/NBK208616/>

Figures

**Figure 1 Title:** UGICR governance structure

Fig 1 legend: HCC= hepatocellular carcinoma

**Figure 2 Title:** Registry Recruitment Schema

For peer review only

1  
2  
3  
4  
5  
6  
7  
8  
9  
10  
11  
12  
13  
14  
15  
16  
17  
18  
19  
20  
21  
22  
23  
24  
25  
26  
27  
28  
29  
30  
31  
32  
33  
34  
35  
36  
37  
38  
39  
40  
41  
42  
43  
44  
45  
46

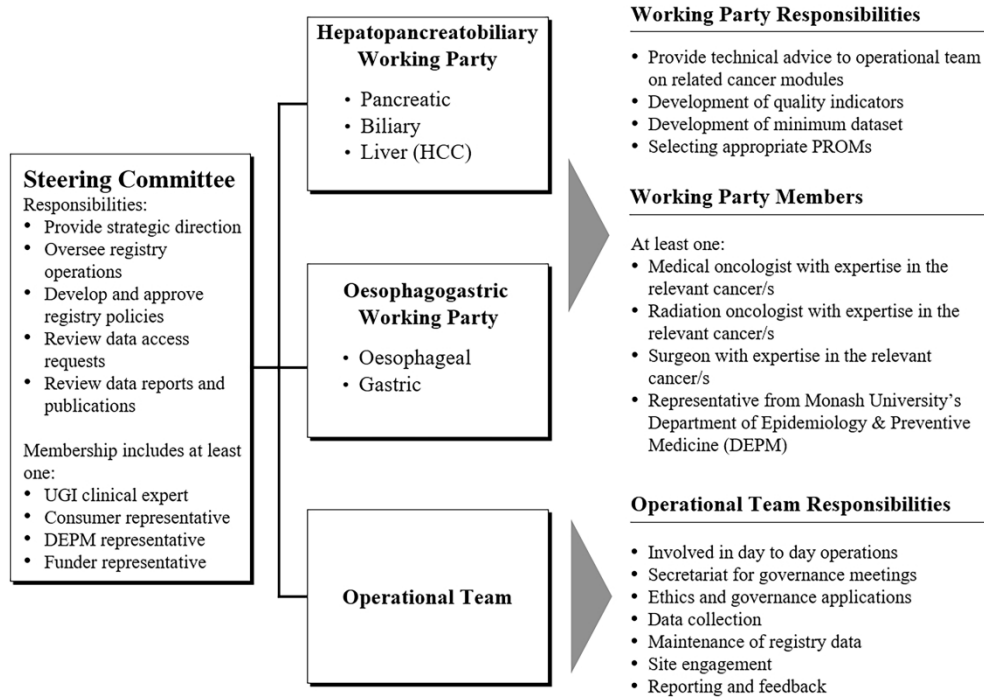

Figure 1: UGICR governance structure / HCC= hepatocellular carcinoma

296x206mm (300 x 300 DPI)

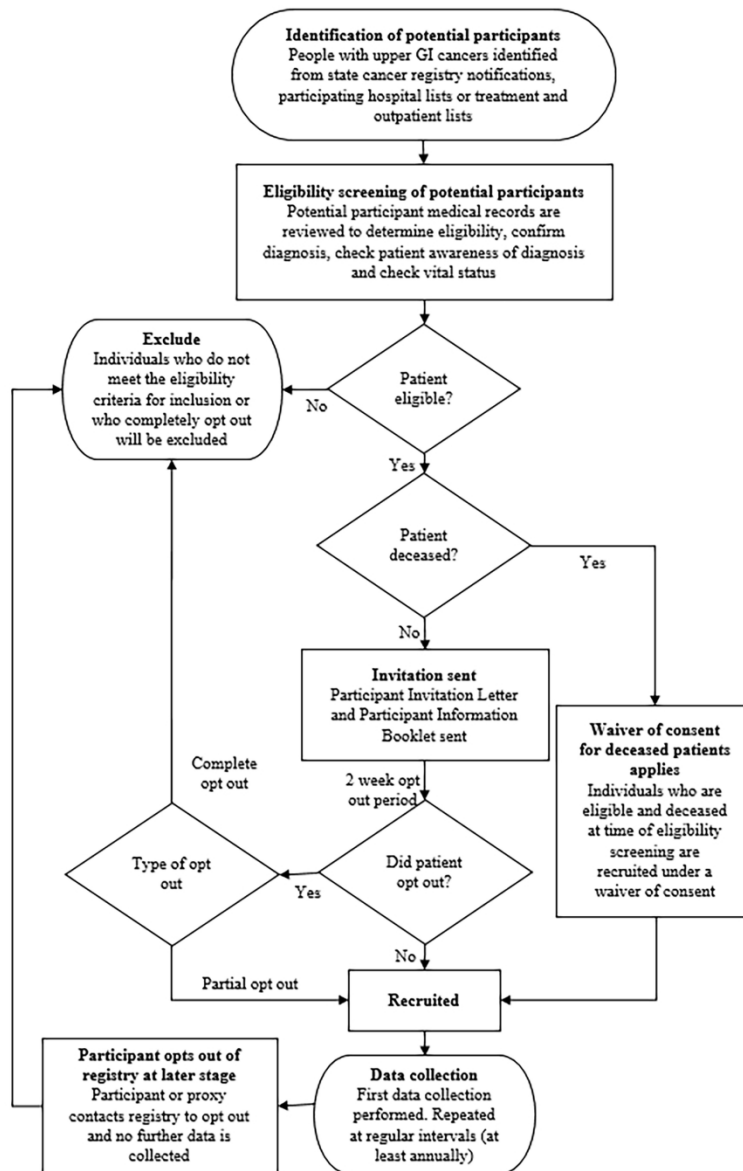

Figure 2 Title: Registry Recruitment Schema

134x208mm (300 x 300 DPI)

# BMJ Open

## Cohort Profile: The Upper Gastrointestinal Cancer Registry (UGICR) - a clinical quality registry to monitor and improve care in upper gastrointestinal cancers

|                               |                                                                                                                                                                                                                                                                                                                                                                                                                                                                                                                                                                                                                                                                                                                                                                                                                                                                                                                                                                                                                                                                                                                                                                                                                                                                                                                                                                                                                                                                                                                                                                                                                                                                                                                                                      |
|-------------------------------|------------------------------------------------------------------------------------------------------------------------------------------------------------------------------------------------------------------------------------------------------------------------------------------------------------------------------------------------------------------------------------------------------------------------------------------------------------------------------------------------------------------------------------------------------------------------------------------------------------------------------------------------------------------------------------------------------------------------------------------------------------------------------------------------------------------------------------------------------------------------------------------------------------------------------------------------------------------------------------------------------------------------------------------------------------------------------------------------------------------------------------------------------------------------------------------------------------------------------------------------------------------------------------------------------------------------------------------------------------------------------------------------------------------------------------------------------------------------------------------------------------------------------------------------------------------------------------------------------------------------------------------------------------------------------------------------------------------------------------------------------|
| Journal:                      | <i>BMJ Open</i>                                                                                                                                                                                                                                                                                                                                                                                                                                                                                                                                                                                                                                                                                                                                                                                                                                                                                                                                                                                                                                                                                                                                                                                                                                                                                                                                                                                                                                                                                                                                                                                                                                                                                                                                      |
| Manuscript ID                 | bmjopen-2019-031434.R1                                                                                                                                                                                                                                                                                                                                                                                                                                                                                                                                                                                                                                                                                                                                                                                                                                                                                                                                                                                                                                                                                                                                                                                                                                                                                                                                                                                                                                                                                                                                                                                                                                                                                                                               |
| Article Type:                 | Cohort profile                                                                                                                                                                                                                                                                                                                                                                                                                                                                                                                                                                                                                                                                                                                                                                                                                                                                                                                                                                                                                                                                                                                                                                                                                                                                                                                                                                                                                                                                                                                                                                                                                                                                                                                                       |
| Date Submitted by the Author: | 26-Aug-2019                                                                                                                                                                                                                                                                                                                                                                                                                                                                                                                                                                                                                                                                                                                                                                                                                                                                                                                                                                                                                                                                                                                                                                                                                                                                                                                                                                                                                                                                                                                                                                                                                                                                                                                                          |
| Complete List of Authors:     | <p>Maharaj, Ashika; Monash University, Epidemiology and Preventative Medicine; Monash University<br/> Holland, Jennifer<br/> Scarborough, Ri<br/> Evans, Sue; Monash University, Epidemiology and Preventative Medicine<br/> Ioannou, Liane; Monash University, Epidemiology and Preventive Medicine<br/> Brown, Wendy; Monash University, Department of Surgery<br/> Croagh, Daniel; Monash Health<br/> Pilgrim, Charles ; Alfred Health<br/> Kench, James ; Royal Prince Alfred Hospital<br/> Lipton, Lara; Western Health<br/> Leong, Trevor; Peter MacCallum Cancer Centre<br/> McNeil, John; Monash University, Epidemiology &amp; Preventive Medicine<br/> Nikfarjam, Mehrdad; University of Melbourne, Department of Surgery, Austin Health<br/> Aly, Ahmad; Austin Health<br/> Burton, Paul; Monash University, Department of Surgery, Alfred Health<br/> Cashin, Paul; Monash Health<br/> Chu, Julie; Peter MacCallum Cancer Centre<br/> Duong, Cuong ; Peter MacCallum Cancer Institute,<br/> Evans, Peter ; Peninsula Health<br/> Goldstein, David ; Prince of Wales Hospital Cancer Services,<br/> Haydon, Andrew ; Alfred Health<br/> Hii, Michael; St Vincent's Hospital<br/> Knowles, Brett ; Royal Melbourne Hospital<br/> Merrett, N; Western Sydney University,<br/> Michael, Michael; Peter MacCallum Cancer Centre<br/> Neale, Rachel E.; QIMR Berghofer Medical Research Institute, Herston, Australia, Population Health Division<br/> Philip, Jennifer; St. Vincent's Hospital<br/> Porter, Ian; Cabrini Health<br/> Smith, Marty; Alfred Health<br/> Spillane, John ; Peter MacCallum Cancer Centre<br/> Tagkalidis, Peter; Alfred Health<br/> Zalcborg, John; Monash University, Epidemiology and Preventative Medicine</p> |
| <b>Primary Subject            | Oncology                                                                                                                                                                                                                                                                                                                                                                                                                                                                                                                                                                                                                                                                                                                                                                                                                                                                                                                                                                                                                                                                                                                                                                                                                                                                                                                                                                                                                                                                                                                                                                                                                                                                                                                                             |

1  
2  
3  
4  
5  
6  
7  
8  
9  
10  
11  
12  
13  
14  
15  
16  
17  
18  
19  
20  
21  
22  
23  
24  
25  
26  
27  
28  
29  
30  
31  
32  
33  
34  
35  
36  
37  
38  
39  
40  
41  
42  
43  
44  
45  
46  
47  
48  
49  
50  
51  
52  
53  
54  
55  
56  
57  
58  
59  
60

|                            |                                                                                                                                                                                                                                                                         |
|----------------------------|-------------------------------------------------------------------------------------------------------------------------------------------------------------------------------------------------------------------------------------------------------------------------|
| Heading</b>:               |                                                                                                                                                                                                                                                                         |
| Secondary Subject Heading: | Public health, Epidemiology                                                                                                                                                                                                                                             |
| Keywords:                  | Hepatobiliary tumours < ONCOLOGY, Gastrointestinal tumours < GASTROENTEROLOGY, Gastrointestinal tumours < ONCOLOGY, Quality in health care < HEALTH SERVICES ADMINISTRATION & MANAGEMENT, Pancreatic disease < GASTROENTEROLOGY, Oesophageal disease < GASTROENTEROLOGY |
|                            |                                                                                                                                                                                                                                                                         |

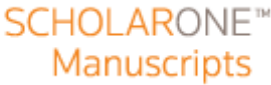

1  
2  
3 **1 Cohort Profile: The Upper Gastrointestinal Cancer Registry (UGICR) – a clinical**  
4  
5 **2 quality registry to monitor and improve care in upper gastrointestinal cancers**  
6  
7  
8  
9

10 **4 Authors**

11 †Ashika D Maharaj<sup>1</sup>, †Jennifer F Holland<sup>1</sup>, Ri O Scarborough<sup>1</sup>, Sue M Evans<sup>1</sup>, Liane J  
12 Ioannou<sup>1</sup>, Wendy Brown<sup>2</sup>, Daniel G Croagh<sup>3</sup>, Charles HC Pilgrim<sup>4</sup>, James G Kench<sup>5</sup>, Lara R  
13 Lipton<sup>6</sup>, Trevor Leong<sup>7</sup>, John J McNeil<sup>1</sup>, Mehrdad Nikfarjam<sup>8</sup>, Ahmad Aly<sup>9</sup>, Paul R Burton<sup>2</sup>,  
14 Paul A Cashin<sup>3</sup>, Julie Chu<sup>7</sup>, Cuong P Duong<sup>7</sup>, Peter Evans<sup>10</sup>, David Goldstein<sup>11</sup>, Andrew  
15 Haydon<sup>4</sup>, Michael W Hii<sup>12</sup>, Brett PF Knowles<sup>13</sup>, Neil D Merrett<sup>14</sup>, Michael Michael<sup>7</sup>, Rachel  
16 E Neale<sup>15</sup>, Jennifer Philip<sup>12</sup>, Ian WT Porter<sup>16</sup>, Marty Smith, John Spillane<sup>7</sup>, Peter P  
17 Tagkalidis<sup>4</sup> and \*John R Zalcborg<sup>1,4</sup>  
18  
19  
20  
21  
22  
23  
24  
25  
26  
27  
28  
29  
30

31 **13 Affiliations**

32  
33 <sup>1</sup> Public Health and Preventive Medicine, Monash University, Victoria, Australia.  
34

35 <sup>2</sup>Department of Surgery, Monash University, Victoria, Australia  
36

37 <sup>3</sup> Monash Health, Victoria, Australia  
38

39 <sup>4</sup> Alfred Health, Victoria, Australia  
40

41 <sup>5</sup> Royal Prince Alfred Hospital, New South Wales, Australia  
42

43 <sup>6</sup> Western Health, Victoria, Australia  
44

45 <sup>7</sup> Peter MacCallum Cancer Centre, Victoria, Australia  
46

47 <sup>8</sup> University of Melbourne, Department of Surgery, Austin Health, Victoria, Australia  
48

49 <sup>9</sup> Austin Health, Victoria, Australia  
50

51 <sup>10</sup> Peninsula Health, Victoria, Australia  
52

53 <sup>11</sup> Nelune Comprehensive Cancer Centre, Prince of Wales New South Wales, Australia  
54

55 <sup>12</sup> St Vincent's Hospital Melbourne, Victoria, Australia  
56

57 <sup>13</sup> Royal Melbourne Hospital, Victoria, Australia  
58  
59  
60



1  
2  
3 27 <sup>14</sup> School of Medicine, Western Sydney University, New South Wales, Australia  
4

5 28 <sup>15</sup> QIMR Berghofer Medical Research Institute, Queensland, Australia  
6

7 29 <sup>16</sup> Cabrini Health, Victoria, Australia  
8

9 30  
10

11  
12 31 **Corresponding Author**  
13

14 32 Prof John Zalcborg  
15

16 33 Public Health and Preventive Medicine  
17

18 34 Monash University  
19

20 35 533 St Kilda Road  
21

22 36 MELBOURNE VIC 3004  
23

24 37 Phone: +61 3 9903 0388  
25

26 38 Email: john.zalcborg@monash.edu  
27

28 39  
29  
30

31  
32 40 † Equal contribution  
33

34 41 \* Corresponding author  
35

36 42  
37

38  
39 43 **Word Count:** 2889 (excluding Abstract and Article Summary)  
40  
41  
42  
43  
44  
45  
46  
47  
48  
49  
50  
51  
52  
53  
54  
55  
56  
57  
58  
59  
60

## 44 ABSTRACT (300 words)

### 45 Purpose

46 The Upper Gastrointestinal Cancer Registry (UGICR) was developed to monitor and improve  
47 the quality of care provided to patients with upper gastrointestinal cancers in Australia.

### 48 Participants

49 It supports four cancer modules: pancreatic, oesophagogastric, biliary, and primary liver  
50 cancer. The pancreatic cancer (PC) module was the first module to be implemented, with  
51 others being established in a staged approach. Individuals are recruited to the registry if they  
52 are aged 18 years or older, have received care for their cancer at a participating public/private  
53 hospital or private clinic in Australia, and do not opt out of participation.

### 54 Findings to Date

55 The UGICR is governed by a multi-disciplinary steering committee which provides clinical  
56 governance and oversees clinical working parties. The role of the working parties is to  
57 develop quality indicators based on best practice for each registry module, develop the  
58 minimum datasets and provide guidance in analysing and reporting of results. Data are  
59 captured from existing data sources (population-based cancer incidence registries, pathology  
60 databases, and hospital coded data) and manually from clinical records. Data collectors  
61 directly enter information into a secure web-based REDCap data collection platform. The PC  
62 module began with a pilot phase and subsequently, we used a formal modified-Delphi  
63 consensus process to establish a core set of quality indicators for PC. The second module  
64 developed was the oesophagogastric cancer (OGC) module. Results of the one year pilot  
65 phases for PC and OGC modules are included in this cohort profile.

### 66 Future plans

67 The UGICR will provide regular reports of risk-adjusted, benchmarked performance on a  
68 range of quality indicators that will highlight variations in care and clinical outcomes at a

1  
2  
3 69 health service level. The registry has also been developed with the view to collect Patient-  
4  
5 70 Reported Outcomes (PROs), which will further add to our understanding of the care of  
6  
7  
8 71 patients with these cancers.

## 10 72 **ARTICLE SUMMARY**

### 12 73 **Strengths & Limitations of this Study**

- 15 74 • The UGICR is the first CQR in Australia, designed to capture information on UGI  
16  
17 75 cancers with the aim to improve practice by monitoring and providing benchmarked  
18  
19 76 reports to participating sites.
- 22 77 • We describe the development of a CQR for UGI cancers, including the establishment of  
23  
24 78 governance, recruitment framework, clinical quality indicators, minimum data set, data  
25  
26 79 access policy and reporting structure.
- 29 80 • This registry was developed as per the Australian Commission on Quality and Safety in  
30  
31 81 Health Care's (ACSQHC) Framework for Australian CQRs and follows ACSQHC's  
32  
33 82 Australian Operating Principles for CQRs and can be used as a model for researchers  
34  
35 83 developing CQRs.
- 38 84 • The time consuming and labour-intensive site governance approval process in Australia  
39  
40 85 is a major limitation for rollout of the registry.

### 42 86 **Keywords**

45 87 pancreatic cancer, oesophageal cancer, gastric cancer, liver cancer, biliary cancer, upper  
46  
47 88 gastrointestinal cancers, clinical registry, quality improvement, quality of care, database,  
48  
49 89 population health

## 52 90 **INTRODUCTION**

55 91 The five most common upper gastrointestinal (UGI) cancers in Australia are pancreas,  
56  
57 92 oesophagus, stomach, liver (hepatocellular carcinoma) and biliary cancers; the combined  
58  
59 93 incidence is approximately 10,000 and there are around 7,500 deaths annually.<sup>1</sup> The five-year

1  
2  
3 94 relative survival rates of UGI cancers are among the worst of all tumour types: 9.8% in  
4  
5 95 pancreas; 18.5% in liver; 20.1% in biliary; 22% in oesophagus; and 30.3% in stomach.<sup>1</sup> The  
6  
7  
8 96 dismal prognosis of these cancers can be largely attributed to their presentation at an  
9  
10 97 advanced disease stage. Additionally, older age is a risk factor for mortality from these  
11  
12 98 tumours, and significant cardiac and respiratory comorbidities may limit treatment options.  
13  
14 99 As a result, only 15% of pancreas, 43% of liver, 20% of oesophagus, and 50% of stomach  
15  
16  
17 100 cancers are potentially resectable at diagnosis.<sup>2,3</sup>

18  
19  
20 101 Resection, with radical lymph node dissection where appropriate, remains the principal  
21  
22 102 potentially curative therapy for all localised UGI cancers. Disease management is almost  
23  
24 103 invariably multimodal and may include chemotherapy and radiotherapy as neo-adjuvant,  
25  
26  
27 104 adjuvant or palliative therapy, and the provision of optimal supportive care.<sup>4-8</sup>

28  
29  
30 105 The aggressive nature of these cancers and the complexity of treatment often decrease health-  
31  
32 106 related quality of life.<sup>9</sup> Advances in surgical techniques and perioperative care have resulted  
33  
34 107 in operative mortality falling to less than 5% in major centres.<sup>10</sup> However surgery remains a  
35  
36  
37 108 morbid procedure with postoperative complications resulting in prolonged hospital  
38  
39 109 admission, adversely impacting on overall quality of life and the ability to undergo any  
40  
41 110 adjuvant therapies.<sup>11</sup> In those surviving one to two years following curative treatment, health-  
42  
43 111 related quality of life generally recovers to baseline. However, there are still major challenges  
44  
45  
46 112 faced by survivors. For those having palliative or supportive therapy only, quality of life  
47  
48 113 frequently deteriorates throughout the disease trajectory.<sup>9</sup>

49  
50  
51 114 Local or distant cancer recurrence occurs frequently following resection for all UGI cancers.  
52  
53 115 A third of patients diagnosed with stomach<sup>12</sup> and half of all patients diagnosed with  
54  
55  
56 116 oesophageal<sup>13</sup> cancer develop recurrent disease within two years. In pancreatic cancer (PC),  
57  
58  
59  
60

1  
2  
3 117 where only 10%-15% of tumours are considered resectable, the local recurrence rate ranges  
4  
5 118 from 10%-40% and distant recurrence is as high as 88%.<sup>14</sup>  
6

### 7 119 **Variation in Management, Treatment & Outcome**

8  
9  
10 120 There is evidence that variability exists in the management and outcomes of UGI cancers. For  
11  
12 121 example: not all patients are presented to a multi-disciplinary team meeting;<sup>15</sup> there are  
13  
14 122 disparities in the utilisation of surgical resection and associated disease-specific survival  
15  
16 123 based on where patients live;<sup>16</sup> there is wide variation in histopathological assessment of  
17  
18 124 margins and the proportion that have clear margins;<sup>14</sup> the duration of surgery, post-operative  
19  
20 125 complication rates and their management differ between public and private hospitals;<sup>17,18</sup>  
21  
22 126 administration of adjuvant chemotherapy or radiotherapy is variable, often due to morbidity  
23  
24 127 associated with postoperative complications;<sup>19</sup> and the 30-day postoperative mortality is  
25  
26 128 lower in hospitals performing more resections each year.<sup>20,21</sup> Patients with UGI cancers have  
27  
28 129 significant unmet needs pertaining to quality of life, finance, relationships, and family or  
29  
30 130 caregiver distress; these are often exacerbated by a lack of understanding of the health  
31  
32 131 system.<sup>22,23</sup> In PC, over 50% of participants (n=136) in an Australian-based study reported  
33  
34 132 moderate to high unmet physical or psychological needs.<sup>24</sup>  
35  
36  
37  
38  
39

### 40 133 **Measuring Quality of Care with Clinical Quality Registries**

41  
42  
43 134 To identify, understand and reduce unwarranted clinical variation and ensure that all patients  
44  
45 135 receive optimal care, it is important to collect high-quality disease-specific data. Clinical  
46  
47 136 Quality Registries (CQRs) support continuous improvements in patient outcomes by  
48  
49 137 monitoring quality of care and providing risk-adjusted feedback to the relevant clinical  
50  
51 138 community. These data describe patterns of treatment in order to identify variation, and can  
52  
53 139 provide a framework for research.<sup>25</sup> Successful implementation of CQRs has been achieved  
54  
55 140 in a range of disciplines include trauma, cardiac, transplant and bariatric surgery,<sup>26</sup> joint  
56  
57 141 replacement,<sup>27</sup> and cancer care (e.g. prostate).<sup>28</sup>  
58  
59  
60

1  
2  
3 142 The Australian Commission on Safety and Quality in Health Care (ACSQHC) supports the  
4  
5 143 development of CQRs in Australia through the provision of the national framework for  
6  
7 144 CQRs.<sup>29</sup> The framework details the necessary principles, guidelines and standards for best  
8  
9 145 practice design, build, operation and security of CQRs. A recent evaluation of the cost-  
10  
11 146 effectiveness of CQRs determined that when funded sufficiently with robust operating  
12  
13 147 procedures, CQRs provide a substantial return on investment.<sup>30</sup> In prioritising the  
14  
15 148 development of CQRs in Australia, the ACSQHC ranked the development of registries for  
16  
17 149 high-burden cancers only behind those monitoring ischemic heart disease and  
18  
19 150 musculoskeletal disorders.<sup>31</sup> Pancreatic cancer is ranked fourth as a high-burden cancer in  
20  
21 151 terms of its impact on disability-adjusted life years behind lung, bowel and breast cancer.<sup>32</sup> It  
22  
23 152 was predicted to be the third leading cause of cancer deaths in the United States in 2018 and  
24  
25 153 by 2030 is predicted to be the second commonest cause of cancer associated mortality.<sup>2</sup>  
26  
27  
28  
29  
30  
31 154 Although a number of generic population-based cancer registries exist, there are no CQRs  
32  
33 155 specific to the five aforementioned UGI cancers. Disease-specific registries<sup>33,34</sup> and audit  
34  
35 156 databases<sup>35</sup> provide much needed evidence about the management of patients with these  
36  
37 157 cancers. However, little prospective data has been published from multi-institution databases  
38  
39 158 and/or registries regarding the quality of UGI cancer care across the disease trajectory.

### 159 Rationale for the UGICR

160 Improvements in cancer outcomes for patients with UGI cancer will understandably come  
161 through establishment of models of care that are informed by close attention to clinical and  
162 patient-reported quality measures and standardisation of treatment which comply with agreed  
163 best practice. Given the lack of Australian population-level data regarding patient outcomes  
164 from UGI cancers, it was considered that a registry established to monitor treatment and  
165 outcomes of patients with cancers arising in the oesophagus, stomach, pancreas, liver and  
166 biliary system will improve management of these diseases. Furthermore, while detailed

1  
2  
3 167 guidelines exist for each of these cancers, gaps remain regarding optimal care and  
4  
5 168 management of these patient groups.<sup>4-8,36</sup>  
6  
7

8 169 The Upper Gastrointestinal Cancer Registry (UGICR) is a CQR established with the aims to:  
9

10  
11 170 (1) assess patterns of care and identify variations in clinical and patient reported outcomes;  
12

13 171 (2) benchmark performance and provide feedback to service providers using a targeted  
14

15 172 quality improvement approach, to drive improvements in current practice;  
16  
17

18 173 (3) provide confidence to public, clinician and wider stakeholders on the delivery of high  
19

20 174 quality service;  
21

22 175 (4) advance knowledge of best treatment protocols by facilitating future clinical, health  
23

24 176 service, psychosocial and biomedical research.  
25  
26  
27

## 28 177 **COHORT DESCRIPTION**

### 29 178 **Overview**

30  
31 179 The UGICR is a multi-centre, population-based, non-interventional prospective cohort study.  
32

33 180 It was established in 2015 in Victoria and has since expanded to the state of New South  
34

35 181 Wales, Australia.  
36  
37  
38

### 39 182 **Ethical approval**

40  
41 183 The registry has human research ethics committee (HREC) approval as a multi-site project  
42

43 184 with National Mutual Acceptance (NMA) from Monash Health (Ref: 15482A). Ethics  
44

45 185 approval has also been obtained from Monash University, Cancer Council Victoria, the  
46  
47

48 186 Aboriginal Health and Medical Research Council of New South Wales and a number of  
49

50 187 private hospitals not recognising the NMA scheme.  
51  
52  
53  
54  
55  
56  
57  
58  
59  
60

## 188 Governance

189 The UGICR is governed by a Steering Committee and, currently, two clinical working parties  
 190 with the responsibility of each outlined in *Figure 1*. The Steering Committee performs in  
 191 accordance with the Australian Framework for CQRs.<sup>29</sup>

192 A central research team provides operational oversights. A Principal Investigator (PI) at each  
 193 participating hospital is responsible for ensuring that research activities undertaken at their  
 194 site are conducted in accordance with the HREC approval, the research protocol, site registry  
 195 agreements, and related policy documentation. At each site patients are identified for  
 196 recruitment and data collection occurs.

197 *Figure 1 here*

## 198 Registry design

199 The UGICR has a multi-modular design with pancreatic, oesophagogastric (OG), liver and  
 200 biliary cancer modules. Data are entered into REDCap (Research Electronic Data Capture), a  
 201 secure web-based application, hosted and managed by Helix (Monash University).<sup>37</sup> The  
 202 registry was developed in REDCap and all data are held securely on a Monash University  
 203 server which has been accredited under the information security standard ISO27001.<sup>38</sup>

## 204 Participant Recruitment and Consent

205 The full recruitment schema is outlined in *Figure 2*. Eligible patients are identified within  
 206 each jurisdiction through state-based cancer registries or by individual health services.  
 207 Eligibility criteria are listed in *Table 1*. The UGICR uses an opt-out approach to minimise  
 208 selection bias.<sup>39</sup>

209 *Figure 2 here*

## 210 Table 1: Eligibility Criteria

| All Modules |                                                                                                                                                                  |
|-------------|------------------------------------------------------------------------------------------------------------------------------------------------------------------|
| Inclusion   | (i) Patient has a confirmed primary pancreatic, oesophageal, gastric, liver, biliary or gallbladder cancer with some limited exclusions specified in each module |



|                         |                  |                                                                                                                                |                                                                                                                                                                             |
|-------------------------|------------------|--------------------------------------------------------------------------------------------------------------------------------|-----------------------------------------------------------------------------------------------------------------------------------------------------------------------------|
|                         |                  | (see below)                                                                                                                    |                                                                                                                                                                             |
|                         | (ii)             | Patient has been assessed or received care at a participating public or private hospital or private clinician rooms            |                                                                                                                                                                             |
|                         | (iii)            | Patient is 18 years of age or older at time of diagnosis                                                                       |                                                                                                                                                                             |
|                         | (iv)             | Patient has a diagnosis date on or after 1st January 2016 (apart from one centre which commenced recruitment in November 2015) |                                                                                                                                                                             |
| <b>Module Specific</b>  |                  |                                                                                                                                |                                                                                                                                                                             |
| <b>Modules</b>          |                  | <b>Tumour Sites</b>                                                                                                            | <b>Tumour Cell Types</b>                                                                                                                                                    |
| <b>Pancreatic</b>       | <i>Inclusion</i> | Pancreas<br>Periampullary region<br>Ampulla of Vater<br>Biliary origin<br>Intestinal origin<br>Distal bile duct                | Ductal adenocarcinoma<br>Cholangiocarcinoma<br>Acinar cell carcinoma<br>Acinar cell cystadenocarcinoma<br>IPMN (invasive)<br>Pancreatoblastoma<br>Serous cystadenocarcinoma |
|                         | <i>Exclusion</i> | Non-distal bile duct                                                                                                           | Neuroendocrine neoplasms<br>Premalignant lesions<br>Mesenchymal tumours<br>Solid pseudopapillary carcinoma<br>IPMN (non-invasive)                                           |
| <b>Oesophagogastric</b> | <i>Inclusion</i> | Oesophagus (lower two thirds)<br>Gastro-oesophageal junction<br>Stomach                                                        | Carcinoma<br>Adenocarcinoma<br>Squamous cell carcinoma<br>Other subtypes                                                                                                    |
|                         | <i>Exclusion</i> | Upper third of oesophagus                                                                                                      | Neuroendocrine neoplasms<br>Lymphomas<br>Mesenchymal tumours                                                                                                                |
| <b>Biliary</b>          | <i>Inclusion</i> | Perihilar (hilar) bile duct<br>Intrahepatic bile duct<br>Gallbladder                                                           | Carcinoma<br>Cholangiocarcinoma<br>Adenosquamous carcinoma<br>Squamous cell carcinoma<br>Cholangiosarcoma                                                                   |
|                         | <i>Exclusion</i> | Distal bile duct                                                                                                               | Neuroendocrine neoplasms<br>Mesenchymal tumours                                                                                                                             |
| <b>Liver*</b>           | <i>Inclusion</i> | Liver                                                                                                                          | Hepatocellular carcinoma                                                                                                                                                    |
|                         | <i>Exclusion</i> | Intrahepatic bile duct                                                                                                         | Cholangiocarcinoma<br>Mesenchymal tumours<br>Germ cell tumours<br>Lymphomas                                                                                                 |

211 Abbreviations: IPMN, Intraductal Papillary Mucinous Neoplasm, \*Liver module eligibility criteria still to be  
212 finalised

213 Eligible participants are mailed an introductory letter explaining the study and an information

214 booklet outlining details of the registry, its purpose, possible outcomes of the research and the

215 opt-out process. Participants are given two weeks to opt out of the registry before their

1  
2  
3 216 participation is assumed, after which we commence collection of clinical and personal data  
4  
5 217 covering diagnosis to end-of-life care. Patients can withdraw their consent from participation  
6  
7 218 in the registry at any point by telephoning or emailing the UGICR office, as outlined in the  
8  
9 219 participant information booklet. A waiver of consent applies where patients deemed eligible  
10  
11 220 require an interpreter, have significant cognitive impairment, or where there is evidence that  
12  
13 221 the patient is deceased.  
14  
15

## 16 222 **FINDINGS TO DATE**

### 17 223 **Data Set**

18  
19 224 The first module developed was the PC module, which began with a pilot phase of  
20  
21 225 approximately one year, during which we collected data for a provisional set of quality  
22  
23 226 indicators in three Victorian sites from 2016-2017. The second module developed using a  
24  
25 227 similar pilot phase was the OG module. Subsequently, we used a formal modified-Delphi  
26  
27 228 consensus process to establish a core set of quality indicators for PC. This process involved  
28  
29 229 19 PC care experts from three states in Australia. A detailed description of the methods of the  
30  
31 230 modified Delphi process and the selected indicators has been published separately.<sup>40</sup> In  
32  
33 231 addition, a review was undertaken of the Australian Optimal Care Pathways (OCP) for PC<sup>41</sup>  
34  
35 232 and OGC<sup>42</sup> to ensure that indicators are aligned with the seven themes described in the OCP  
36  
37 233 (prevention and early detection; presentation, initial investigations and referral; diagnosis,  
38  
39 234 staging and treatment planning; treatment; care after initial treatment and recovery; managing  
40  
41 235 recurrent, residual, or metastatic disease; end-of-life care). An outline of this process for PC  
42  
43 236 is provided in *Table 2*. There are currently no clinical quality indicators in the UGICR that  
44  
45 237 measure care for the prevention and early detection of PC. However, the UGICR is  
46  
47 238 participating in a collaborative project, Symptom-UGI: Upper Gastrointestinal Cancer  
48  
49 239 Symptom Study, to map the patient pathways from onset of symptoms to cancer diagnosis.  
50  
51  
52  
53  
54  
55  
56  
57  
58  
59  
60

1  
2  
3  
4  
5  
6  
7  
8  
9  
10  
11  
12  
13  
14  
15  
16  
17  
18  
19  
20  
21  
22  
23  
24  
25  
26  
27  
28  
29  
30  
31  
32  
33  
34  
35  
36  
37  
38  
39  
40  
41  
42  
43  
44  
45  
46  
47  
48  
49  
50  
51  
52  
53  
54  
55  
56  
57  
58  
59  
60

240 Details of this study can be found within the UGICR website (<https://ugicr.org.au/associated->  
241 [studies/](#)).

For peer review only

Table 2: PC Optimal Care Pathway Mapped to Modified-Delphi Quality Indicators

| PC OPTIMAL CARE PATHWAY (OCP)                                        | OCP ELEMENTS                                                                            | MAPPED QUALITY INDICATORS FROM MODIFIED-DELPHI CONSENSUS <sup>41</sup>                                                                                                                                                                                                                                                                                                                   |
|----------------------------------------------------------------------|-----------------------------------------------------------------------------------------|------------------------------------------------------------------------------------------------------------------------------------------------------------------------------------------------------------------------------------------------------------------------------------------------------------------------------------------------------------------------------------------|
| <b>STEP ONE: Prevention and early detection</b>                      | 1.1 Prevention<br>1.2 Risk factors<br>1.3 Early detection                               | NIL                                                                                                                                                                                                                                                                                                                                                                                      |
| <b>STEP TWO: Presentation, initial investigations and referral</b>   | 2.1 Signs and symptoms<br>2.2 Assessments by GP or medical practitioner<br>2.3 Referral | <ul style="list-style-type: none"> <li>Documented baseline CA19-9 level before treatment</li> <li>Documented ECOG and/or ASA at presentation</li> <li>Time from referral to definitive treatment within 60 days</li> </ul>                                                                                                                                                               |
|                                                                      | 2.4, 3.5, 4.6, 5.4, 6.6, 7.3<br>Support and communication                               | NIL                                                                                                                                                                                                                                                                                                                                                                                      |
| <b>STEP THREE: Diagnosis, assessment and treatment planning</b>      | 3.1 Diagnostic workup<br>3.2 Staging<br>3.3 Treatment planning                          | <ul style="list-style-type: none"> <li>Documented pancreatic protocol CT or MRI scan for diagnosis and/or staging</li> <li>Operability of tumour is clearly defined and documented as either operable/resectable, borderline resectable, locally advanced (unresectable) or metastatic (unresectable)</li> <li>Disease management for all patients discussed at a MDT meeting</li> </ul> |
|                                                                      | 3.4, 4.4, 5.3, 6.5, 7.2<br>Research and clinical Trials                                 | <ul style="list-style-type: none"> <li>Number of patients included in a clinical trial</li> </ul>                                                                                                                                                                                                                                                                                        |
|                                                                      | 3.1, 3.2<br>Timeframe                                                                   | <ul style="list-style-type: none"> <li>Time from referral to definitive treatment within 60 days</li> </ul>                                                                                                                                                                                                                                                                              |
| <b>STEP FOUR: Treatment</b>                                          | 4.1 Treatment intent                                                                    | NIL                                                                                                                                                                                                                                                                                                                                                                                      |
|                                                                      | 4.2.1 Surgery (Curative)                                                                | <ul style="list-style-type: none"> <li>All patients who did not undergo surgery should have a valid reason documented</li> <li>Number of patients undergoing PC surgery in a level 1-4 hospital</li> </ul>                                                                                                                                                                               |
|                                                                      | 4.2.1 Chemotherapy or chemo-radiation                                                   | <ul style="list-style-type: none"> <li>Adjuvant chemotherapy administered following surgery or a reason documented for not undergoing treatment</li> </ul>                                                                                                                                                                                                                               |
|                                                                      | 4.2.2, 4.3<br>Treatment of unresectable PC / palliative care                            | <ul style="list-style-type: none"> <li>Chemotherapy ± chemo-radiation offered to patients with locally advanced disease, or a reason documented for not undergoing treatment</li> <li>Number of patients who saw a medical or radiation oncologist or a reason documented for not doing so</li> </ul>                                                                                    |
|                                                                      | 4.5 Complementary or alternative therapies                                              | NIL                                                                                                                                                                                                                                                                                                                                                                                      |
| <b>STEP FIVE: Care after initial treatment and recovery</b>          | 5.1 Survivorship<br>5.2 Post-treatment care planning                                    | <ul style="list-style-type: none"> <li>All patients having completed treatment followed up by a specialist every three to six months for up to 2 years</li> </ul>                                                                                                                                                                                                                        |
| <b>STEP SIX: Managing recurrent, residual and metastatic disease</b> | 6.1 Signs and symptoms of recurrent, residual or metastatic disease                     |                                                                                                                                                                                                                                                                                                                                                                                          |
| <b>STEP SEVEN: End-of-life care</b>                                  | 6.4 Palliative care                                                                     | <ul style="list-style-type: none"> <li>All patients with metastatic disease referred to (or seen by) palliative care specialist</li> </ul>                                                                                                                                                                                                                                               |
|                                                                      | 7.1 Multidisciplinary palliative care                                                   |                                                                                                                                                                                                                                                                                                                                                                                          |

*Footnote: Some elements in each step of the pathway are overlapping. Elements 6.2 & 6.3 readdress steps 3 and 4. Please note: The purpose of this document is to provide a broad overview of the areas within the OCP that the developed PC quality indicators measure. Only the key indicators that map to the elements are listed.*

243  
1  
2  
3  
4  
5  
6  
7  
8  
9  
10  
11  
12  
13  
14  
15  
16  
17  
18  
19  
20  
21  
22  
23  
24  
25  
26  
27  
28  
29  
30  
31  
32  
33  
34  
35  
36  
37  
38  
39  
40  
41  
42  
43  
44  
45  
46

For peer review only

1  
2  
3 244 The minimum data set was established to enable quality indicators to be calculated. Data  
4  
5 245 items and definitions were aligned with national specifications where appropriate and a  
6  
7 246 comprehensive data dictionary was developed for each module. The core data items are  
8  
9  
10 247 outlined in *Table 3*.  
11  
12  
13  
14  
15  
16  
17  
18  
19  
20  
21  
22  
23  
24  
25  
26  
27  
28  
29  
30  
31  
32  
33  
34  
35  
36  
37  
38  
39  
40  
41  
42  
43  
44  
45  
46  
47  
48  
49  
50  
51  
52  
53  
54  
55  
56  
57  
58  
59  
60

For peer review only

248 Table 3: UGICR Minimum Dataset<sup>#</sup>

249

| Participant details                  | Diagnosis and staging (prior to anti-tumour treatment)                              | Chemotherapy                                                    |
|--------------------------------------|-------------------------------------------------------------------------------------|-----------------------------------------------------------------|
| Title                                | Diagnosis date                                                                      | Treatment intent<br>(Neoadjuvant/Adjuvant/Curative/Palliative)* |
| First name                           | Date mass first seen on imaging                                                     | Date chemotherapy commenced                                     |
| Middle name(s)                       | Diagnostic imaging tests completed <sup>^</sup>                                     | Chemotherapy agent(s) administered                              |
| Surname                              | Pathology testing prior to anti-tumour treatment                                    | Name of medical oncologist                                      |
| Recruiting hospital                  | Cytology date                                                                       | Hospital providing chemotherapy                                 |
| Medical Record Number                | Histology date                                                                      | <b>Radiotherapy</b>                                             |
| Date of birth                        | Primary site of tumour                                                              | Treatment intent<br>(Neoadjuvant/Adjuvant/Curative/Palliative)* |
| Sex                                  | Tumour morphology                                                                   | Date radiotherapy commenced                                     |
| Medicare number                      | Clinical disease stage (TNM)                                                        | Radiation oncologist                                            |
| Department of Veteran Affairs number | Resectability of tumour at diagnosis                                                | Radiotherapy technique                                          |
| Country of birth                     | CA 19-9 measured                                                                    | Body sites treated                                              |
| Preferred language                   | Discussion at a multidisciplinary team meeting                                      | Total dose given (Gy)                                           |
| Interpreter required                 | Date earliest multidisciplinary team meeting discussion                             | Number of fractions                                             |
| Indigenous status                    | Diagnosing hospital                                                                 | Name of radiation oncologist                                    |
| Contact details                      | <b>Surgery</b>                                                                      | Hospital providing radiotherapy                                 |
| Phone number(s)                      | Date of operation                                                                   | <b>Restaging after neoadjuvant therapy</b>                      |
| Email address                        | Type of resection                                                                   | Date neoadjuvant therapy completed                              |
| Postal address                       | Surgical approach                                                                   | Resectability of tumour                                         |
| Residential address at diagnosis     | Reason resection surgery abandoned                                                  | Clinical disease (TNM)                                          |
| Next of kin and contact details      | Date of return to theatre                                                           | <b>Other treatment and end-of-life care</b>                     |
| General Practitioner details         | Re-admitted to hospital within 90 days of surgery (excluding same day chemotherapy) | Referral to or contact with palliative care                     |
| Deceased status                      | Date of readmission                                                                 | Date of referral to palliative care                             |
| Date of death                        | Died in surgical admission                                                          | ≥2 ED presentations in the last 30 days prior to death          |
| Cause of death                       | Name of consultant surgeon                                                          | ≥14 days in acute hospital during last 30 days of life          |
|                                      | Hospital where surgery was performed                                                | Died within 30 days of dose of chemotherapy                     |
|                                      | Resection pathology                                                                 |                                                                 |
|                                      | Maximum dimension of tumour                                                         |                                                                 |
|                                      | Number of lymph nodes examined                                                      |                                                                 |
|                                      | Number of lymph nodes positive                                                      |                                                                 |
|                                      | Closest reported margin                                                             |                                                                 |
|                                      | Pathologic staging (pTNM)                                                           |                                                                 |
|                                      | Histology                                                                           |                                                                 |

250 # More detailed, module specific data dictionaries have been developed. <sup>^</sup>Varies between modules \*All related data items collected for first cycle of each type of treatment  
251 intent

1  
2  
3 252 The OGC module has been developed by the OGC working party following a literature  
4  
5 253 review, and a consensus method was used to agree upon the quality indicator set. The registry  
6  
7  
8 254 has future plans to begin the collection of Patient Reported Outcomes (PROs) and Patient  
9  
10 255 Reported Experiences (PREs) to provide valuable patient perspectives. As an initial step, a  
11  
12 256 systematic review evaluating Patient Reported Outcome Measures (PROMs) in PC has been  
13  
14  
15 257 undertaken by the UGICR team to define which PROMs are most appropriate for this group  
16  
17 258 of patients.

### 19 259 [Data collection](#)

21 260 If the participant has not opted out of the registry, data collectors abstract diagnosis, surgical,  
22  
23 261 pathology and treatment data directly from the participant's electronic and/or hard copy  
24  
25 262 medical records from participating sites or from clinician rooms. Data collection begins close  
26  
27  
28 263 to the time of recruitment with at least annual follow-up until end-of-life.

### 31 264 [Results from the pilot studies from the PC and OGC modules.](#)

33 265 The results of the pilot phase for both PC and OGC modules are displayed in Table 4. Of the  
34  
35 266 123 participants eligible for the PC module and 189 for the OGC module, 8 (6.5%) and 9  
36  
37 267 (4.8%) opted out of the registry, respectively. Clinical stage at diagnosis was not well  
38  
39 268 documented in both the PC module (n = 80, 70% ) and OGC cancer module (n = 82, 46%)  
40  
41  
42 269 and is an area for future quality improvement. Around 20% of the pancreatic cohort received  
43  
44 270 surgery as first treatment which is broadly representative of surgical treatment in patients  
45  
46 271 with PC<sup>43</sup>. Further, 73 participants in the PC and 94 participants in the OGC module had  
47  
48 272 documented reasons for no surgery. The pilot results for both modules identified areas for  
49  
50 273 improving data completeness, definitions, items and structure of data collection forms.  
51  
52  
53 274 Following the pilot phase, the registry focused on improving these areas before expanding to  
54  
55 275 other participating hospitals.  
56  
57  
58  
59  
60



276 Table 4: PC and OGC Module Data from Pilot Data Collection

| Variable                                         | PC Module<br>n (%) | OGC Module<br>n (%) |
|--------------------------------------------------|--------------------|---------------------|
| <b>Recruited</b>                                 | <b>115</b>         | <b>180</b>          |
| Recruited via invitation letter                  | 88 (76.5)          | 120 (66.7)          |
| Recruited via waiver of consent<br>(deceased)    | 27 (23.5)          | 60 (33.3)           |
| <b>Sex</b>                                       |                    |                     |
| Male                                             | 56 (48.7)          | 132 (73.3)          |
| Female                                           | 59 (51.3)          | 48 (26.7)           |
| <b>Age at diagnosis (years)</b>                  |                    |                     |
| <50                                              | 6 (5.2)            | 11 (6.1)            |
| 50-59                                            | 14 (12.2)          | 22 (12.2)           |
| 60-69                                            | 30 (26.1)          | 54 (30.0)           |
| 70-79                                            | 38 (33.0)          | 54 (30.0)           |
| ≥80                                              | 22 (19.1)          | 33 (18.3)           |
| Missing                                          | 5 (4.3)            | 6 (3.3)             |
| <b>Resectability at diagnosis</b>                |                    |                     |
| Resectable                                       | 25 (21.7)          | 58 (32.2)           |
| Borderline resectable                            | 3 (2.6)            | 11 (6.1)            |
| Unresectable                                     | 67 (58.3)          | 64 (35.6)           |
| <i>Locally Advanced (LA)</i>                     | 24 (20.9)          | 6 (3.3)             |
| <i>Metastatic (Mets)</i>                         | 43 (37.4)          | 58 (32.2)           |
| Not documented                                   | 14 (12.2)          | -                   |
| Unknown                                          | -                  | 41 (22.8)           |
| Missing                                          | 6 (5.2)            | 6 (3.3)             |
| <b>Clinical stage at diagnosis</b>               |                    |                     |
| I or II                                          | 5 (4.3)            | 33 (18.3)           |
| III                                              | -                  | 7 (3.9)             |
| IV                                               | 18 (15.7)          | 50 (27.8)           |
| Complete TNM <sup>a</sup> not documented         | 80 (69.6)          | 82 (45.6)           |
| Missing                                          | 12 (10.4)          | 8 (4.4)             |
| <b>First treatment</b>                           |                    |                     |
| Neoadjuvant therapy                              | 4 (3.5)            | 60 (33.3)           |
| Attempted or completed resection<br>surgery      | 27 (23.5)          | 13 (7.2)            |
| Curative intent ChemoTx and/or RT <sup>b</sup>   | -                  | 7 (3.9)             |
| Palliative intent ChemoTx and/or RT <sup>b</sup> | 37 (32.2)          | 55 (30.6)           |
| No treatment                                     | 29 (25.2)          | 23 (12.8)           |
| Unknown                                          | -                  | 16 (8.9)            |
| Missing                                          | 18 (15.7)          | 6 (3.3)             |
| <b>Reasons for no surgery<sup>c</sup></b>        |                    |                     |
| LA or Mets                                       | 62                 | 60                  |
| Advanced age                                     | 1                  | 6                   |
| Comorbidities                                    | 7                  | 9                   |
| Patient declined                                 | 1                  | 12                  |
| Patient died prior to surgery                    | 0                  | 7                   |
| Performance status                               | -                  | 4                   |

| Variable                                  | PC Module<br>n (%) | OGC Module<br>n (%) |
|-------------------------------------------|--------------------|---------------------|
| Other reason                              | 1                  | -                   |
| Reason not documented                     | 4                  | 3                   |
| <b>Participant data collection status</b> |                    |                     |
| Complete                                  | 51 (44.3)          | 107 (59.4)          |
| Incomplete                                | 64 (55.7)          | 73 (40.6)           |
| <b>Data entry sub-form completeness</b>   |                    |                     |
| Demographics                              | 113 (98.2)         | 180 (100.0)         |
| Vital status and tumour recurrence        | 58 (50.4)          | 145 (80.6)          |
| Diagnosis details                         | 97 (84.3)          | 165 (91.7)          |
| Biliary stents                            | 94 (81.7)          | -                   |
| Surgery                                   | 102 (88.7)         | 168 (93.3)          |
| Pathology of resection sample             | 102 (88.7)         | -                   |
| Neoadjuvant therapy                       | 104 (90.4)         | -                   |
| Adjuvant therapy                          | 98 (85.2)          | -                   |
| Therapy for locally advanced disease      | 95 (82.6)          | -                   |
| Therapy for metastatic disease            | 77 (67.0)          | -                   |
| Other treatment and trials                | 80 (70.0)          | -                   |
| Treatment summary                         | - -                | 167 (92.8)          |
| Restaging after neoadjuvant therapy       | - -                | 167 (92.8)          |
| Chemotherapy details                      | - -                | 162 (90.0)          |
| Radiotherapy details                      | - -                | 163 (90.6)          |
| End-of-life details                       | - -                | 81 (45.0)           |

277 <sup>a</sup> TNM system of classification of cancer, <sup>b</sup> ChemoTx and/or RT = Chemotherapy and/or radiotherapy <sup>c</sup> Reason  
278 for no surgery: Participants may have more than one reason documented

## 279 Population Coverage

280 Population coverage in Victoria is based on data from the Victorian Cancer Registry. The  
281 population coverage in the pilot phase was 19% for the PC module and 11% for the OGC  
282 module. Current coverage is 73% for PC and 55% for the OGC module. In New South  
283 Wales, data is currently only being collected on the PC module with an estimated population  
284 coverage of 55%.

## 285 Reporting

286 The registry will produce risk-adjusted benchmarked reports that will feed back de-identified  
287 data to participating sites on the associated quality indicators. To provide fair and meaningful  
288 benchmarked reports, we have undertaken a review of risk models to identify demographic  
289 and baseline clinical variables (focusing on those over which clinicians have no control e.g.  
290 age, sex, disease stage) that predict patient outcomes for the purposes of risk-adjustment. The

1  
2  
3 291 data from the registry will also permit validation of current predictive risk models and enable  
4  
5 292 further refinement of these tools. Publicly available annual reports that provide an overview  
6  
7 293 of quality of care and the registry's activities will be published. A UGICR website  
8  
9  
10 294 (<https://ugicr.org.au/>) has been developed to provide information about the registry to  
11  
12 295 patients, clinicians and other stakeholders. This will be updated to include results as they  
13  
14  
15 296 become available.

## 17 297 **STRENGTHS AND LIMITATIONS**

18  
19 298 The UGICR is Australia's first UGI cancer CQR. The aims of the registry are to monitor  
20  
21 299 quality of care, benchmark clinical and patient-reported outcomes against best practice, and  
22  
23 300 provide high-quality population-based data for clinical research. Registries such as the  
24  
25 301 UGICR provide much needed real-world evidence outside the context of randomised control  
26  
27 302 trials about disease epidemiology, treatment patterns, burden of illness, survival outcomes,  
28  
29 303 clinical variation, and treatment safety.<sup>44</sup>

30  
31  
32  
33  
34 304 In recent decades, there has been increasing integration of PROMs into cancer registries to  
35  
36 305 collect outcomes such as overall quality of life, functional and psychosocial well-being,  
37  
38 306 lifestyle behaviours, and supportive care needs.<sup>45</sup> Clinicians and patients may place different  
39  
40 307 emphasis on symptom impacts and expectations from their treatment.<sup>46</sup> The collection of  
41  
42 308 PROMs is an important step in understanding patients' experience of their symptoms and  
43  
44 309 management, and the impact of the disease and its treatment on their quality of life. The  
45  
46 310 UGICR will determine and integrate the most relevant PROMs for each UGI cancer type  
47  
48 311 following thorough examination of the literature.

49  
50  
51  
52  
53 312 Through the accumulation of significant and consistent data on UGI cancers, the registry will  
54  
55 313 assess how clinical management compares with best practice and communicate this to  
56  
57 314 clinicians through the PIs or relevant hospital departments. Further, the UGICR provides a

1  
2  
3 315 platform for longer-term clinical follow-up, randomised clinical trials and sub-studies  
4  
5 316 exploring treatment outcomes and linking outcomes to tumour tissue characteristics.  
6  
7  
8 317 An important consideration is the maturity of each module before useful quality indicator  
9  
10 318 reports can be provided to participating hospitals, as some UGI cancers have a relatively low  
11  
12 319 incidence in comparison to other cancers.<sup>1</sup> The working groups in collaboration with  
13  
14 320 statisticians will determine an analysis plan for each indicator with due consideration to data  
15  
16 321 completeness and risk adjustment methods.  
17

### 322 Identified challenges

323 The UGICR has faced some key challenges affecting its establishment and implementation.  
324 The introduction of the NMA scheme has significantly streamlined the ethics process for all  
325 public hospitals in Australia, except in the Northern Territory, making the process to gain  
326 approval for CQRs more manageable. However, obtaining governance approval at each site  
327 continues to be both labour intensive and time consuming.<sup>47,48</sup> Further, separate HREC  
328 approval is frequently required to access data from private hospitals and clinics.  
329 Funding is another challenge faced by CQRs. As with many healthcare initiatives, the  
330 financial burden can be a major impediment.<sup>25</sup> Data from CQRs are held in positive regard by  
331 clinicians, health managers and government. However, further funding will be required to  
332 progress national rollout of the registry.  
333 Other identified barriers include reluctance of some healthcare providers to supply source  
334 data, and poor interoperability between clinical information systems leading to duplication of  
335 data entry. Where data are of high quality, such as for diagnosis and procedure codes,  
336 administrative data is appropriate, but there are limited data for comorbidities and risk  
337 factors.<sup>49</sup> While automation of data collection from existing data sources would be ideal, this  
338 is hampered by inconsistent documentation and a lack of standardisation.<sup>50</sup>

### 339 Collaboration

340 The UGICR aims to capture whole of population, real-world data that monitors and aspires to  
341 improve the quality of care provided to patients with UGI cancers. The registry is currently  
342 recruiting hospitals to increase population capture and selecting the most relevant instruments  
343 for measuring PROs and PREs for inclusion in each module. The biliary module is entering  
344 its pilot phase and the liver module is to be developed. Monash University is the UGICR's  
345 data custodian and is accountable for the privacy, security and integrity of patient information  
346 held within the registry. Participating sites can request a copy of their own patient-level data.  
347 Researchers may access registry data following a formal submission to the UGICR data  
348 custodian and approval by the UGICR Steering Committee. They are required to complete a  
349 request form detailing their research aims and methods, potential impact on healthcare, and  
350 provide evidence relevant HREC approval before de-identified data will be released. The  
351 registry will harness new opportunities for data linkage with technologies such as the  
352 electronic medical records and collaborate with existing data repositories (e.g. biomedical) to  
353 evolve and fulfil its aim of providing quality evidence.

### 354 DECLARATIONS

#### 355 Ethics approval

356 This project has received human research ethics committee (HREC) approval from the  
357 following HRECs: Monash Health (Ref: 15482A) under the National Mutual Acceptance  
358 (NMA) scheme (HREC/15/MonH/134); Cancer Council Victoria (HREC 1611); Epworth  
359 HealthCare (EH2017-227), Aboriginal Health & Medical Research Council (1387/18) and is  
360 registered with Monash University (CF16/119-2016000051).

#### 361 Patient and Public Involvement

362 Consumer representatives are involved at the level of the steering committee and provide  
363 oversight on the relevant modules as they are developed by the UGICR. Consumers

1  
2  
3 364 representatives will also be involved in future studies which include the selection of a core-  
4  
5 365 set of PROMs.

#### 8 366 [Consent for publication](#)

10 367 Not Applicable

#### 12 368 [Availability of data and material](#)

14 369 Not Applicable

#### 17 370 [Competing interests](#)

19 371 None declared

#### 21 372 [Data sharing statement](#)

24 373 This study describes attributes of the registry and contains no patient-level data

#### 26 374 [Funding](#)

28 375 The authors gratefully acknowledge the Victorian Government, Pancare Foundation,  
30 376 Specialised Therapeutics Australia, Servier Australia, Eli Lilly Australia, and the Australian  
31 377 National Health and Medical Research Council (NHMRC) for the Pancreatic Cancer Registry  
32 378 for Quality Improvement (PCR4QI) grant [grant number APP1125395]. The Victorian  
33 379 Government and Pancare Foundation were involved in the design of the study through  
34 380 steering committee representation.

#### 42 381 [Authors' Contributions](#)

44 382 AM and JH are joint first authors on this manuscript. SE, WB, DC, CP, JK, LL, TL, JM, MN  
45 383 and JZ are part of the UGICR Steering Committee. SE, LI, WB, DC, CP, JK, LL, TL, MN,  
46 384 AA, PB, PC, JC, CD, PE, DG, AH, MH, BK, NM, MM, RN, JP, IP, MS, JS, PT and JZ are  
47 385 part of the working parties. RS and JH developed the registry protocol in consultation with  
48 386 the UGICR Steering Committee and working parties. All authors reviewed and provided  
49 387 feedback on the drafts of the manuscript and approved the final version.

1  
2  
3 388 [Acknowledgements](#)  
4

5 389 The authors first and foremost gratefully acknowledge and thank our participants. We also  
6  
7  
8 390 thank our consumer representatives, Jan Gibson and David Attwood, for their ongoing  
9  
10 391 support and contribution to the registry. The authors would also like to acknowledge the  
11  
12 392 participating hospitals, site investigators and Victorian Cancer Registry for providing  
13  
14 393 ongoing data to the UGICR.  
15  
16  
17  
18  
19  
20  
21  
22  
23  
24  
25  
26  
27  
28  
29  
30  
31  
32  
33  
34  
35  
36  
37  
38  
39  
40  
41  
42  
43  
44  
45  
46  
47  
48  
49  
50  
51  
52  
53  
54  
55  
56  
57  
58  
59  
60

For peer review only

## 394 REFERENCES

- 395 1. Australian Institute of Health and Welfare. Cancer in Australia 2019. Canberra: AIHW; 2019.  
396 205p. Cancer series no.119
- 397 2. Siegel RL, Miller KD, Jemal A. Cancer statistics, 2017. *CA Cancer J Clin*. 2017 Jan;67(1):7-30.
- 398 3. Ruge M, Fassan M, Graham DY, Strong VE (ed). Epidemiology of Gastric Cancer [internet].  
399 Switzerland: Springer; 2015 [cited 2018 Nov 18]. p23-34. Available from URL DOI  
400 (10.1007/978-3-319-15826-6\_2)
- 401 4. Ducreux M, Cuhna AS, Caramella C, et al. Cancer of the pancreas: ESMO Clinical Practice  
402 Guidelines for diagnosis, treatment and follow-up. *Ann Oncol* 2015 Sep;26(suppl\_5):v56-v68.
- 403 5. Vogel A, Cervantes A, Chau I, et al. Hepatocellular carcinoma: ESMO Clinical Practice  
404 Guidelines for diagnosis, treatment and follow-up. *Ann Oncol* 2018 Oct;29(Supplement\_4):  
405 iv238-iv55.
- 406 6. Lordick F, Mariette C, Haustermans K, et al. Oesophageal cancer: ESMO Clinical Practice  
407 Guidelines for diagnosis, treatment and follow-up. *Ann Oncol* 2016 Sep;27(suppl\_5):v50-v7.
- 408 7. Smyth EC, Verheij M, Allum W, et al. Gastric cancer: ESMO Clinical Practice Guidelines for  
409 diagnosis, treatment and follow-up. *Ann Oncol* 2016 Sep;27(suppl\_5):v38-v49.
- 410 8. Valle JW, Borbath I, Khan SA, et al. Biliary cancer: ESMO Clinical Practice Guidelines for  
411 diagnosis, treatment and follow-up. *Ann Oncol* 2016 Sep;27(suppl\_5):v28-v37.
- 412 9. Whistance RN, Blazeby JM. Systematic review: Quality of life after treatment for upper  
413 gastrointestinal cancer. *Curr Opin Support Palliat Care* 2011;5(1):37-46.
- 414 10. Davis SS, Babidge WJ, Kiermeier A, et al. Perioperative Mortality Following Oesophagectomy  
415 and Pancreaticoduodenectomy in Australia. *World J Surg* 2018 Mar;42(3):742-8.
- 416 11. Zhou J, Hiki N, Mine S, et al. Role of prealbumin as a powerful and simple index for  
417 predicting postoperative complications after gastric cancer surgery. *Ann Surg Oncol* 2017  
418 Feb;24(2):510-7.
- 419 12. Spolverato G, Ejaz A, Kim Y, et al. Rates and Patterns of Recurrence after Curative Intent  
420 Resection for Gastric Cancer: A United States Multi-Institutional Analysis. *J Am Coll Surg*  
421 2014 Oct;219(4):664-75.
- 422 13. Knight WC, Zylstra J, Van Hemelrijck M, et al. Patterns of recurrence in oesophageal cancer  
423 following oesophagectomy in the era of neoadjuvant chemotherapy. *BJS Open* 2017  
424 Dec;1(6):182-90.
- 425 14. Chandrasegaram MD, Goldstein D, Simes J, et al. Meta-analysis of radical resection rates and  
426 margin assessment in pancreatic cancer. *BJS Open* 2015 Nov;102(12):1459-72.
- 427 15. Brauer DG, Strand MS, Sanford DE, et al. Utility of a multidisciplinary tumor board in the  
428 management of pancreatic and upper gastrointestinal diseases: an observational study. *HPB*  
429 (Oxford) 2017 Feb;19(2):133-9.
- 430 16. Shapiro M, Chen Q, Huang Q, et al. Associations of socioeconomic variables with resection,  
431 stage, and survival in patients with early-stage pancreatic cancer. *JAMA Surg* 2016  
432 Apr;151(4):338-45.
- 433 17. Chua TC, Mittal A, Nahm C, et al. Pancreatoduodenectomy in a public versus private  
434 teaching hospital is comparable with some minor variations. *ANZ J Surg* 2018;88(6):E526-  
435 E31.
- 436 18. Busweiler LA, Henneman D, Dikken JL, et al. Failure-to-rescue in patients undergoing surgery  
437 for esophageal or gastric cancer. *Eur J Surg Oncol* 2017 Oct;43(10):1962-9.
- 438 19. Schouwenburg MG, Busweiler LAD, Beck N, et al. Hospital variation and the impact of  
439 postoperative complications on the use of perioperative chemo(radio)therapy in resectable  
440 gastric cancer. Results from the Dutch Upper GI Cancer Audit. *Eur J Surg Oncol* 2018  
441 Apr;44(4):532-8.
- 442 20. Dikken JL, Van Sandick JW, Allum WH, et al. Differences in outcomes of oesophageal and  
443 gastric cancer surgery across Europe. *BJS Open* 2013 Jan;100(1):83-94.



1  
2  
3  
4  
5  
6  
7  
8  
9  
10  
11  
12  
13  
14  
15  
16  
17  
18  
19  
20  
21  
22  
23  
24  
25  
26  
27  
28  
29  
30  
31  
32  
33  
34  
35  
36  
37  
38  
39  
40  
41  
42  
43  
44  
45  
46  
47  
48  
49  
50  
51  
52  
53  
54  
55  
56  
57  
58  
59  
60

- 444 21. Skipworth RJE, Parks RW, Stephens NA, et al. The relationship between hospital volume and post-operative mortality rates for upper gastrointestinal cancer resections: Scotland 1982–2003. *Eur J Surg Oncol* 2010 Feb;36(2):141-7.
- 445
- 446
- 447 22. Otutaha B, Srinivasa S, Koea J. Patient information needs in upper gastrointestinal cancer: what patients and their families want to know. *ANZ J Surg* 2018 Jan;89(1-2):20-4
- 448
- 449 23. Shaw J, Harrison J, Young J, et al. Coping with newly diagnosed upper gastrointestinal cancer: a longitudinal qualitative study of family caregivers' role perception and supportive care needs. *Support Care Cancer* 2013 Mar;21(3):749-56.
- 450
- 451
- 452 24. Beesley VL, Janda M, Goldstein D, et al. A tsunami of unmet needs: pancreatic and ampullary cancer patients' supportive care needs and use of community and allied health services. *Psycho-Oncology* 2016 Feb;25(2):150-7.
- 453
- 454
- 455 25. Wilcox N, McNeil JJ. Clinical quality registries have the potential to drive improvements in the appropriateness of care. *Med J Aust* 2016 Nov;205(10):S27-S9.
- 456
- 457 26. Stey AM, Russell MM, Ko CY, et al. Clinical registries and quality measurement in surgery: a systematic review. *Surgery* 2015 Feb;157(2):381-95.
- 458
- 459 27. Owen D, Russell N, Smith P, et al. An estimation of the incidence of squeaking and revision surgery for squeaking in ceramic-on-ceramic total hip replacement: a meta-analysis and report from the Australian Orthopaedic Association National Joint Registry. *Bone Joint J* 2014 Feb;96(2):181-7.
- 460
- 461
- 462
- 463 28. Evans SM, Millar JL, Wood JM, et al. The Prostate Cancer Registry: monitoring patterns and quality of care for men diagnosed with prostate cancer. *BJU Int* 2013;111(4b):E158-E66.
- 464
- 465 29. Australian Commission on Safety and Quality in Healthcare (ACSQHC). Framework for Australian Clinical Quality Registries. Australia 2014 [cited 2018 29/10/2018]; Available from: <https://www.safetyandquality.gov.au/our-work/information-strategy/clinical-quality-registries/>
- 466
- 467
- 468
- 469 30. Ahern S, Evans S, Hopper I, Zalcborg J. Towards a strategy for clinical quality registries in Australia. *Aust Heal Rev* 2018 Feb.
- 470
- 471 31. Australian Commission on Safety and Quality in Healthcare. Prioritised list of clinical domains for clinical quality registry development: Final report. Sydney: ACSQHC; 2016.
- 472
- 473 32. Australian Institute of Health and Welfare. Burden of Cancer in Australia: Australian Burden of Disease Study 2011. Canberra: AIHW. 2017. 145p. Study series no. 12
- 474
- 475 33. Egawa S, Toma H, Ohigashi H, et al. Japan Pancreatic Cancer Registry; 30th year anniversary: Japan Pancreas Society. *Pancreas* 2012 Oct;41(7):985-92.
- 476
- 477 34. De Steur W, Henneman D, Allum W, et al. Common data items in seven European oesophagogastric cancer surgery registries: towards a European upper GI cancer audit (EURECCA Upper GI). *Eur J Surg Oncol* 2014 Mar;40(3):325-9.
- 478
- 479
- 480 35. Busweiler L, Jeremiasen M, Wijnhoven B, et al. International benchmarking in oesophageal and gastric cancer surgery. *BJS Open* 2018 Oct.
- 481
- 482 36. Te Riele W, van Tinteren H, van Sandick J. Centralization of upper gastrointestinal cancer care should be dictated by quality of care. *Ann Surg Oncol* 2018 Dec;25:984-5
- 483
- 484 37. Harris PA, Taylor R, Thielke R, et al. Research electronic data capture (REDCap)--a metadata-driven methodology and workflow process for providing translational research informatics support. *J Biomed Inform* 2009 Apr;42(2):377-81.
- 485
- 486
- 487 38. International Standards Organisation. ISO/IEC 27001 Information technology - Security techniques - Information security management systems - Requirements: ISO; 2005.
- 488
- 489 39. Tu JV, Willison DJ, Silver FL, et al. Impracticability of Informed Consent in the Registry of the Canadian Stroke Network. *N Engl J Med* 2004 Apr;350(14):1414-21.
- 490
- 491 40. Maharaj AD, Ioannou L, Croagh D, et al. Monitoring quality of care for patients with pancreatic cancer: a modified Delphi consensus. *HPB (Oxford)* 2018 Oct.
- 492
- 493 41. Cancer Council Australia. Optimal Care Pathway for People with Pancreatic Cancer. 2016 [cited 2018 Oct 20]; Available from:
- 494

- 1  
2  
3 495 [https://www.cancer.org.au/content/ocp/health/optimal-care-pathway-for-people-with-](https://www.cancer.org.au/content/ocp/health/optimal-care-pathway-for-people-with-pancreatic-cancer-june-2016.pdf)  
4 496 [pancreatic-cancer-june-2016.pdf](https://www.cancer.org.au/content/ocp/health/optimal-care-pathway-for-people-with-pancreatic-cancer-june-2016.pdf)  
5 497 42. Cancer Council Australia. Optimal Care Pathway for People with Oesophagogastric Cancer.  
6 498 2016 [2018 Nov 18]; Available from:  
7 499 [https://www.cancer.org.au/content/ocp/health/optimal-care-pathway-for-people-with-](https://www.cancer.org.au/content/ocp/health/optimal-care-pathway-for-people-with-oesophagogastric-cancer-june-2016.pdf)  
8 500 [oesophagogastric-cancer-june-2016.pdf](https://www.cancer.org.au/content/ocp/health/optimal-care-pathway-for-people-with-oesophagogastric-cancer-june-2016.pdf)  
9 501 43. Siegel RL, Miller KD, Jemal A. Cancer statistics, 2018. *CA: CA-Cancer J Clin* 2018;68(1):7-30.  
10 502 44. Berger ML, Sox H, Willke RJ, et al. Good practices for real-world data studies of treatment  
11 503 and/or comparative effectiveness: Recommendations from the joint ISPOR-ISPE Special Task  
12 504 Force on real-world evidence in health care decision making. *Pharmacoepidemiol Drug Saf*  
13 505 2017 Sep;26(9):1033-9.  
14  
15 506 45. Ashley L, Jones H, Thomas J, et al. Integrating patient reported outcomes with clinical cancer  
16 507 registry data: a feasibility study of the electronic Patient-Reported Outcomes From Cancer  
17 508 Survivors (ePOCS) system. *J Med Internet Res* 2013 Oct;15(10):e230-e.  
18 509 46. Chassany O, Shaheen NJ, Karlsson M, et al. Systematic review: symptom assessment using  
19 510 patient-reported outcomes in gastroesophageal reflux disease and dyspepsia. *Scand J*  
20 511 *Gastroenterol* 2012;47(12):1412-21.  
21 512 47. Clay-Williams R, Taylor N, Braithwaite J. Potential solutions to improve the governance of  
22 513 multi centre health service research. *Med J Aust* 2018 Mar;208(4):152-4.  
23 514 48. Brown WA, Smith BR, Boglis M, et al. Streamlining ethics review for multisite quality and  
24 515 safety initiatives: national bariatric surgery registry experience. *Med J Aust* 2016  
25 516 Sep;205(200-1).  
26 517 49. Alexander M, Evans SM, Wolfe R, et al. Risks of using medical record and administrative data  
27 518 for prognostic models. *Med J Aust* 2017 Aug;207(3):126.  
28 519 50. Gliklich RE DN, Leavy MB,. Registries for Evaluating Patient Outcomes: A User's  
29 520 Guide[internet]. 3<sup>rd</sup> Ed. Rockville (MD): Agency for Healthcare Research and Quality (US);  
30 521 2014 Apr. Available from: <https://www.ncbi.nlm.nih.gov/books/NBK208616/>  
31  
32  
33  
34  
35  
36  
37  
38  
39  
40  
41  
42  
43  
44  
45  
46  
47  
48  
49  
50  
51  
52  
53  
54  
55  
56  
57  
58  
59  
60

## FIGURE TITLES AND LEGEND

1  
2  
3  
4  
5  
6  
7  
8  
9  
10  
11  
12  
13  
14  
15  
16  
17  
18  
19  
20  
21  
22  
23  
24  
25  
26  
27  
28  
29  
30  
31  
32  
33  
34  
35  
36  
37  
38  
39  
40  
41  
42  
43  
44  
45  
46

**Figure 1 Title:** UGICR governance structure

Fig 1 legend: HCC= hepatocellular carcinoma

**Figure 2 Title:** Registry Recruitment Schema

For peer review only



Figure 1: UGICR governance structure / HCC= hepatocellular carcinoma

296x206mm (300 x 300 DPI)

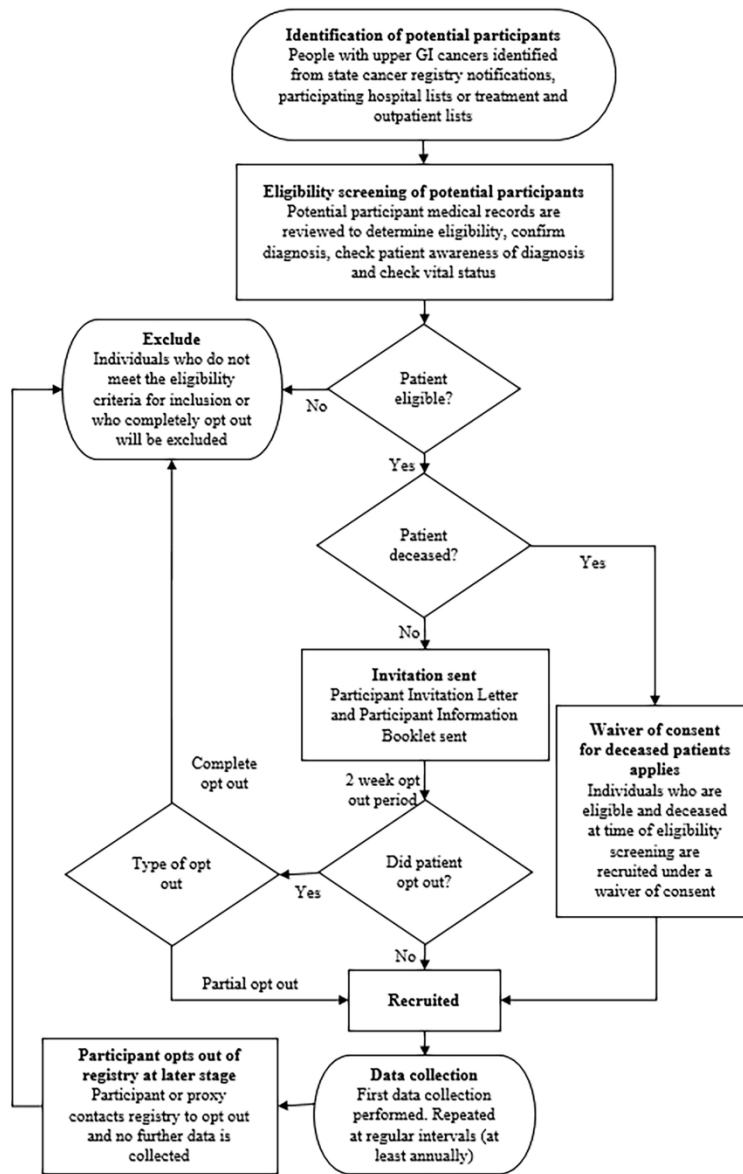

Figure 2 Title: Registry Recruitment Schema

134x208mm (300 x 300 DPI)
